# Supplementary material for: Genital Mycoplasmas and Biomarkers of Inflammation and Their Association With Spontaneous Preterm Birth and Preterm Prelabor Rupture of Membranes: A Systematic Review and Meta-Analysis
Source: Front Microbiol. 2022 Mar 30;13:859732. doi: 10.3389/fmicb.2022.859732 (PMC9006060; doi:10.3389/fmicb.2022.859732)
Supplement: Supplementary file 5 [file Table_4.xlsx]

## Sheet: FULL-TEXT ARTICLES EXCLUDED
TITLE	YEAR	FIRST AUTHOR	REASON
Isolation of Mycoplasma hominis, T-strains/and cytomegalovirus from the cervix of pregnant women	1970	Foy	NOT PTB
Mycoplasma hominis and postpartum febrile complications	1971	Harwick	OTHER DISEASE
Placental infection with Mycoplasma homonis and Ureaplasma urealyticum: clinical correlation.	1980	Embree	NOT PTB/PPROM AS ISOLATE OUTCOME
Ureaplasma urealyticum incriminated in perinatal morbidity and mortality.	1981	Kundsin	NOT PTB/PPROM AS ISOLATE OUTCOME
Isolation of Mycoplasma hominis and Ureaplasma urealyticum from amniotic fluid at 16-20 weeks of gestation: potential effect on outcome of pregnancy.	1983	Cassell	CASE REPORT
Cervical Chlamydia trachomatis and mycoplasmal infections in pregnancy. Epidemiology and outcomes.	1983	Harrison	INSUFFICIENT DATA ON GM
Low birth weight and maternal colonization with genital mycoplasmas	1986	Kass	REVIEW ARTICLE
Cervical colonization with Ureaplasma urealyticum and pregnancy outcome: prospective studies	1986	Harrison	INSUFFICIENT DATA ON GM
Chorionic mycoplasmas and prematurity.	1986	Zlatnik	INSUFFICIENT DATA ON GM
Further studies on genital mycoplasmas in intra-amniotic infection: blood cultures and serologic response.	1986	Gibbs	INSUFFICIENT DATA ON GM
Chorioamnionitis: its association with pregnancy outcome and microbial infection.	1987	Quinn	NOT PTB
Colonization with Genital Mycoplasmas in Pregnant Women and their Neonates and Birth Weight	1987	Nakamoto	INSUFFICIENT DATA ON GM
[Role of Ureaplasma urealyticum in premature rupture of the membranes].	1987	Leng	INSUFFICIENT DATA ON GM
The role of mycoplasmas, ureaplasmas and chlamydiae in the genital tract of women presenting in spontaneous early preterm labour.	1987	Lamont	INSUFFICIENT DATA ON GM
Epidemiology and Pathogenesis of Ureaplasma Urealyticum in Spontaneous Abortion and Early Preterm Labor	1987	Naessens	INSUFFICIENT DATA ON GM
Isolation of genital mycoplasmas and Chlamydia trachomatis in stillborn and neonatal autopsy material	1988	Madan	NOT PTB
Prevalences of Chlamydia trachomatis, Mycoplasma hominins and Ureaplasma urealyticum in a defined population of healthy pregnant swedish women	1988	Hakan	INSUFFICIENT DATA ON GM
Serotypes of Ureaplasma urealyticum isolated from normal prgnant women and patients with pregnancy complications	1988	Naessens	INSUFFICIENT DATA ON GM
Erythromycin therapy for subclinical intrauterine infections in threatened preterm delivery - a preliminary report	1988	Winkler	INSUFFICIENT DATA ON GM
Is genital colonization with Mycoplasma hominis and Ureaplasma urealyticum associated with prematurity/low birth weight?	1989	Romero	REVIEW ARTICLE
Detection of Chlamydia trachomatis, Mycoplasma hominis and Ureaplasma urealyticum in pregnant Dutch women.	1989	Vonsée	NOT PTB
Postpartum bacteremia and placental colonization with genital mycoplasmas and pregnancy outcome.	1989	Naessens	INSUFFICIENT DATA ON GM
Incidence of Ureaplasma urealyticum and Mycoplasma hominis infection in pregnant women and gynecological patients; the effectivity of doxycycline therapy	1989	Horvath	INSUFFICIENT DATA ON GM
Association of Chlamydia trachomatis and Mycoplasma hominis with intrauterine growth retardation and preterm delivery. The John Hopkins Study of Cervicitis and Adverse Pregnancy Outcome.	1989	Mattern	INSUFFICIENT DATA ON GM
Sociocultural factors inpuerperal infectious morbidity among Navajo women	1989	Boyce	INSUFFICIENT DATA ON GM
Cervicovaginal microflora and pregnancy outcome: results of a double-blind, placebo-controlled trial of erythromycin treatment.	1990	McGregor	INSUFFICIENT DATA ON GM
Meconium-stained amniotic fluid: A risk factor for microbial invasion of the amniotic cavity	1991	Romero	OTHER DISEASE
Antepartum cultures for Ureaplasma urealyticum are not useful in predicting pregnancy outcome. The Vaginal Infections and Prematurity Study Group.	1991	Carey	INSUFFICIENT DATA ON GM
Incidence of nonbacterial intraamniotic infections in abnormal pregnancies	1991	Abzug	INSUFFICIENT DATA ON GM
Prevalence of potential pathogens in cervical canal before termination of pregnancy	1992	Cohn	ABORTION
[Ureaplasma urealyticum and Mycoplasma hominis: incidence and clinical significance of their isolation in the perinatal period].	1992	Fullana Montoro	INSUFFICIENT DATA ON GM
The prevalence of potential pathogenic micro-organisms in the endocervix of pregnant women at Tygerberg Hospital.	1992	van Rensburg	INSUFFICIENT DATA ON GM
[Role of mycoplasmas in the last month of pregnancy and postpartum pathology. Prospective study of 577 pregnancies]	1992	Jacqui	INSUFFICIENT DATA ON GM
Adverse outcome in pregnancy following amniotic fluid isolation of Ureaplasma urealyticum.	1992	Gray	INSUFFICIENT DATA ON GM
Genital mycoplasmas and pregnancy. Preliminary results	1992	Segonds	INSUFFICIENT DATA ON GM
Use of the polymerase chain reaction for detection of Mycoplasma fermentans and Mycoplasma genitalium in the urogenital tract and amniotic fluid.	1993	Blanchard	METHODOLOGY
Sexual intercourse during pregnancy and preterm delivery: effects of vaginal microorganisms. The Vaginal Infections and Prematurity Study Group.	1993	Read	INSUFFICIENT DATA ON GM
The severity of fetal membrane infection and pregnancy complications	1993	Krohn	INSUFFICIENT DATA ON GM
Prevalence and influence of Mycoplasma hominis and Ureaplasma urealyticum in 218 African pregnant women and their infants.	1994	Luton	INSUFFICIENT DATA ON GM
Prevalence of genital mycoplasma & ureaplasma infections in pregnancy & their effect on pregnancy outcome.	1994	Choudhury	INSUFFICIENT DATA ON GM
Genital Mycoplasmas in Pregnancy and Obstetric Outcome	1994	Chua	INSUFFICIENT DATA ON GM
Genital mycoplasmas in placental infections.	1994	Stein	INSUFFICIENT DATA ON GM
Amniotic Fluid Glucose Concentration: A Marker for Infection in Preterm Labor and Preterm Premature Rupture of Membranes	1994	Dildy	INSUFFICIENT DATA ON GM
Antibodies to Ureaplasma urealyticum in women with intraamniotic infection and adverse pregnancy outcome.	1995	Horowitz	INSUFFICIENT DATA ON GM
Association between bacterial vaginosis and preterm delivery of a low-birth-weight infant. The Vaginal Infections and Prematurity Study Group.	1995	Hillier	INSUFFICIENT DATA ON GM
Microbiological evaluation of women with bad obstetrics history.	1995	Mookherjee	INSUFFICIENT DATA ON GM
Infection of the amniotic cavity with Ureaplasma urealyticum in the midtrimester of pregnancy.	1995	Horowitz	INSUFFICIENT DATA ON GM
Bacterial 16s rDNA polymerase chain reaction in the detection of intra-amniotic infection	1996	Jalava	NOT PTB
Lower genital tract swabs in the prediction of intrauterine infection in preterm prelabour rupture of the membranes	1996	Carrol	INSUFFICIENT DATA ON GM
Amniotic fluid gram stain and leukocyte count in the prediction of intrauterine infection in preterm prelabour amniorrhexis.	1996	Carroll	INSUFFICIENT DATA ON GM
The role of Ureaplasma urealyticum in adverse pregnancy outcome.	1997	Knox	INSUFFICIENT DATA ON GM
Comparison of PCR, nested PCR, and random amplified polymorphic DNA PCR for detection and typing of Ureaplasma urealyticum in specimens from pregnant women.	1998	Knox	METHODOLOGY
Histologic chorioamnionitis & its association with prematurity in a hospital-based study.	1998	Paul	NOT PTB
Association of oligohydramnios in women with preterm premature rupture of membranes with an inflammatory response in fetal, amniotic, and maternal compartments	1999	Yoon	OTHER DISEASE
Intrauterine Infection and Spontaneous Midgestation Abortion" Is the Spectrum of Microorganisms Similar to That in Preterm Labor?	2000	McDonald	NOT PTB
Maternal serum and amniotic fluid cytokines in patients with preterm premature rupture of membranes with and without intrauterine infection	2002	Shobokshia	INSUFFICIENT DATA ON GM
Cervicovaginal infection as a risk factor for premature labor	2002	Montoya	INSUFFICIENT DATA ON GM
First trimester microbiology of the cervix and the outcome of pregnancies at high risk for prematurity	2002	Škrablin	INSUFFICIENT DATA ON GM
Preterm labour-is Mycoplasma hominis involved?	2002	Odendaal	INSUFFICIENT DATA ON GM
Detection of Ureaplasma urealyticum in second-trimester amniotic fluid by polymerase chain reaction correlates with subsequent preterm labor and delivery.	2003	Gerber	INSUFFICIENT DATA ON GM
Cervicovaginal infections during pregnancy: epidemiological and microbiological aspects	2004	Benedetto	INSUFFICIENT DATA ON GM
Cervicovaginal infections during pregnancy: epidemiological and microbiological aspects	2004	Benedetto	NO DATA PTB PREVALENCE
Prevalence of Mycoplasma genitalium in early pregnancy and relationship between its presence and pregnancy outcome.	2004	Oakeshott	INSUFFICIENT DATA ON GM
Maternal genital colonization with Ureaplasma urealyticum promotes preterm delivery: association of the respiratory colonization of premature infants with chronic lung disease and increased mortality.	2004	Kafetzis	INSUFFICIENT DATA ON GM
Relationship between antenatal inflammation and antenatal infection identified by detection of microbial genes by polimerase chain reaction	2005	Miralles	NEONATAL INFECTION
Monocyte chemotatic protein-2 and -3 in amniotic fluid: relationship to microbial invasion of the cavity, intra-amniotic inflammation and preterm delivery.	2005	Jacobsson	INSUFFICIENT DATA ON GM
Idiopathic vaginal bleeding during pregnancy as the only clinical manifestation of intrauterine infection	2005	Gomez	INSUFFICIENT DATA ON GM
A low vaginal ‘‘pool’’ amniotic fluid glucose measurement is a predictive but not a sensitive marker for infection in women with preterm premature rupture of membranes	2006	Buhimschi	NO DATA PPROM ALONE
Readily treatable reproductive tract infections and preterm birth among black women	2006	French	SISTEMATIC REVIEW
Amniotic fluid intercellular adhesion molecule-1 is a marker for Ureaplasma infection in women with preterm labor.	2006	Hadar	INSUFFICIENT DATA ON GM
Reference weights for placentas delivered before the 28th week of gestation.	2007	Hecht	NOT PTB
Antibiotic administration to patients with preterm premature rupture of membranes does not eradicate intra-amniotic infection.	2007	Gomez	INSUFFICIENT DATA ON GM
Value of placental microbial evaluation in diagnosing intra-amniotic infection.	2007	Pettker	INSUFFICIENT DATA ON GM
Amnionitis with Ureaplasma urealyticum or other microbes leads to increased morbidity and prolonged hospitalization in very low birth weight infants.	2007	Kirchner	INSUFFICIENT DATA ON GM
Colonization of second-trimester placenta parenchyma	2008	Onderdonk	INSUFFICIENT DATA ON GM
A high Nugent score but not a positive culture for genital mycoplasmas is a risk factor for spontaneous preterm birth.	2009	Lee	INSUFFICIENT DATA ON GM
Prevalence of genital mycoplasmas, ureaplasmas and chlamydia in pregnancy.	2009	Govender	INSUFFICIENT DATA ON GM
Interleukin-6 and Mycoplasma hominis as markers of preterm birth and related brain damage: our experience.	2009	Massaro	INSUFFICIENT DATA ON GM
Outcome of very preterm infants with Mycoplasma/Ureaplasma airway colonization treated with Josamycine	2010	See	NEONATAL INFECTION
The clinical significance of eosinophils in the amniotic fluid in preterm labor	2010	Romero	INSUFFICIENT DATA ON GM
Prevalence and antibiotic susceptibility of Mycoplasma hominis and Ureaplasma urealyticum in pregnant women	2010	Bayraktar	ABORTION
Association of abnormal vaginal flora and Ureaplasma species as risk factors for preterm birth: a cohort study.	2010	Breugelmans	INSUFFICIENT DATA ON GM
Placental features of chorioamnionitis colonized with Ureaplasma species in preterm delivery	2010	Namba	INSUFFICIENT DATA ON GM
Perinatal results in threatened preterm labor related to Ureaplasma urealyticum colonization	2011	Ros	INSUFFICIENT DATA ON GM
Prevalence of Chlamydia trachomatis and Mycoplasma genitalium in pregnant women of Sabzevar-Iran	2011	Hasanabad	INSUFFICIENT DATA ON GM
Bacteria identified by PCR in fetal membranes following preterm labour associated with increased toll receptor expression	2012	Albar	CONGRESS ABSTRACT
Premature rupture of membranes before 34 weeks managed expectantly: maternal and perinatal outcomes in singletons	2013	Goya	INSUFFICIENT DATA ON GM
The relationship between the intensity of intra-amniotic inflammation and the presence and severity of acute histologic chorioamnionitis in preterm gestation	2014	Kim	INSUFFICIENT DATA ON GM
Sterile intra-amniotic inflammation in asymptomatic patients with a sonographic short cervix: prevalence and clinical significance	2014	Romero	NOT PTB
Bedside assessment of amniotic fluid interleukin-6 in preterm prelabor rupture of membranes	2014	Kacerovsky	INSUFFICIENT DATA ON GM
Co-infection with vaginal Ureaplasma urealyticum and Mycoplasma hominis increases adverse pregnancy outcomes in patients with preterm labor or preterm premature rupture of membranes.	2014	Dong-Wook	INSUFFICIENT DATA ON GM
Epidemiologic factors and urogenital infections associated with preterm birth in a midwestern U.S. population.	2014	Agger	INSUFFICIENT DATA ON GM
Treatment of genital mycoplasma in colonized pregnant women in late pregnancy is associated with a lower rate of premature labour and neonatal complications.	2014	Vouga	INSUFFICIENT DATA ON GM
Term and preterm labour are associated with distinct microbial community structures in placental membranes which are independent of mode of delivery	2014	Doyle	INSUFFICIENT DATA ON GM
Ureaplasma species and Mycoplasma hominis in cervical fluid of pregnancies complicated by preterm prelabor rupture of membranes	2014	Musilova	INSUFFICIENT DATA ON GM
Prevalence and risk factors associated with Chlamydia trachomatis , Neisseria gonorrhoeae and Mycoplasma genitalium infectious in French prgnant women	2015	Peuchant	POSTER PRESENTATION
Sexually transmitted pathogens, coinfections and risk factors in patients attending obstetrics and gynecology clinics in Jalisco, Mexico	2015	Casillas-Vega	NOT PTB
Usefulness of maternal serum C-reactive protein with vaginal Ureaplasma urealyticum as a marker for prediction of imminent preterm delivery and chorioamnionitis in patients with preterm labor or preterm premature rupture of membranes	2015	Kwak	INSUFFICIENT DATA ON GM
Neonatal outcomes in subgroups of women with preterm prelabor rupture of membranes before 34 weeks.	2016	Stepan	INSUFFICIENT DATA ON GM
IGFBP-1 marker of cervical ripening and predictor of preterm birth	2016	Ðogić	NOT PTB
Outcomes following intra-amniotic instillation with indigo carmine to diagnose prelabor rupture of membranes in singleton pregnancies: a single center experience	2016	Adekola	INSUFFICIENT DATA ON GM
Maternal risk factors for abnormal vaginal flora during pregnancy	2016	Tibaldi	NOT PTB
Association between maternal genital mycoplasma colonization and histologic chorioamnionitis in preterm births.	2016	Stirling	INSUFFICIENT DATA ON GM
Maternal risk factors for abnormal vaginal flora during pregnancy	2016	Tibaldi	INSUFFICIENT DATA ON GM
Simultaneously Monitoring Immune Response and Microbial Infections During Pregnancy through Plasma cfRNA Sequencing	2017	Pan	INSUFFICIENT DATA ON GM
Ureaplasma Infection Mediated Release of Matrix Metalloproteinase-9 and PGP – a Novel Mechanism of Preterm Rupture of Membranes and Chorioamnionitis	2017	Lal	INSUFFICIENT DATA ON GM
Twenty-four percent of patients with clinical chorioamnionitis in preterm gestations have no evidence of either culture-proven intraamniotic infection or intraamniotic inflammation	2017	Oh	NOT PTB
Correlation between cervical infection and preterm labor	2017	Ðogić	NOT PTB
Microbial invasion of the amniotic cavity in midtrimester pregnancies using molecular microbiology	2017	Rowlands	INSUFFICIENT DATA ON GM
Effect of Genital Sampling Site on the Detection and Quantification of Ureaplasma Species with Quantitative Polymerase Chain Reaction during Pregnancy.	2017	Faron	INSUFFICIENT DATA ON GM
Is Ureaplasma spp. the leading causative agent of acute chorioamnionitis in women with preterm birth?	2017	Kikhney	INSUFFICIENT DATA ON GM
Effect of Mycoplasma hominis and cytomegalovirus infection on pregnancy outcome: A prospective study of 200 Mongolian women and their newborns.	2017	Otgonjargala	INSUFFICIENT DATA ON GM
Plasma inflammatory and immune proteins as predictors of intra-amniotic infection and spontaneous preterm delivery in women with preterm labor: a retrospective study	2018	Park	INSUFFICIENT DATA ON GM
Inflammatory proteins in maternal plasma, cervicovaginal and amniotic fluid as predictors of intra-amniotic infection in preterm premature rupture of membranes	2018	Mi Lee	METHODOLOGY
Bacterial culture-negative subclinical intra-amniotic infection can be detected by bacterial 16S ribosomal DNA-amplifying polymerase chain reaction	2018	Morimoto	METHODOLOGY
Association between pneumonia in preterm infants and genital mycoplasmas in placentas	2018	Ostrovskaya	ABSTRACT CONGRESS
A novel mba-based Real time PCR approach for genotyping of Ureaplasma parvum validated in a cohort of Mongoloan mothers and offspring	2018	Otgonjargal	INSUFFICIENT DATA ON GM
Prediction of Chorioamnionitis in Cases of Intraamniotic Infection by Ureaplasma Premature Rupture of Membranes or Preterm Labour.	2018	Revello	NOT PTB
Type II restriction modification system in Ureaplasma parvum OMC-P162 strain.	2018	Wu	METHODOLOGY
Epidemiological Trends of Sexually Transmitted Infections with Ureaplasma urealyticum among Women in Cheonan, South Korea: 2006−2017	2018	Jeon	NOT PTB
Frequency of chlamydia trachomatis, mycoplasma genitalium, and ureaplasma urealyticum isolated from vaginal samples of women in Kerman, Iran	2018	Zahirnia	ABORTION
Enrichment of Clinically Relevant Organisms in Spontaneous Preterm-Delivered Placentas and Reagent Contamination Across All Clinical Groups in a Large Pregnancy Cohort in the United Kingdom	2018	Leon	INSUFFICIENT DATA ON GM
Amniotic fluid cell-free DNA in preterm prelabour rupture of membranes	2018	Kacerovsky	INSUFFICIENT DATA ON GM
Gastric Fluid used to assess chances during the latency period in preterm prelabor rupture of membranes	2018	Musilova	INSUFFICIENT DATA ON GM
Positive culture rate and antimicrobial susceptibilities of Mycoplasma hominis and Ureaplasma urealyticum.	2019	Kim	TREATMENT
Prevalence and incidence of Mycoplasma genitalium in a cohort of HIV-infected and HIV-uninfected pregnant women in Cape Town, South Africa	2019	Smullin	OTHER DISEASE
Microbiological analysis of the maternal genital tract and umbilical cord blood and its association with neonatal damage	2019	Perazzi	INSUFFICIENT DATA ON GM
Correlation between Ureaplasma spp. Sub-group 1 and preterm pre-labor rupture of membranes revealed by na eMLST scheme	2019	Kong	INSUFFICIENT DATA ON GM
Infection/inflammation-associated preterm delivery within 14 days of presentation with symptoms of preterm labour: A multivariate predictive model	2019	Amabebe	INSUFFICIENT DATA ON GM
