# Supplementary material for: Genital Mycoplasmas and Biomarkers of Inflammation and Their Association With Spontaneous Preterm Birth and Preterm Prelabor Rupture of Membranes: A Systematic Review and Meta-Analysis
Source: Front Microbiol. 2022 Mar 30;13:859732. doi: 10.3389/fmicb.2022.859732 (PMC9006060; doi:10.3389/fmicb.2022.859732)
Supplement: Supplementary file 8 [file Table_7.xlsx]

## Sheet: Supp Table 7
First author	Year	Country	Time of screening	Definition of outcome (PTB, PTL, pPROM)	Specimen Used	Method of Detection	Gestational age measurement	Type of biomarker	Unit	Sample Size	Preterm Labor							Preterm Delivery							pPROM
											PTL MEDIAN or MEAN	PTL RANGE or SD	PTL n	Control/Term MEDIAN or MEAN	Control/Term RANGE or SD	Control/Term n	p value	PTB MEDIAN or MEAN	PTB RANGE or SD	PTB n	Control/Term MEDIAN or MEAN	Control/Term RANGE or SD	Control n	p value	pPROM MEDIAN or MEAN	pPPROM RANGE or SD	pPROM n	Control/Term MEDIAN or MEAN	Control/Term RANGE or SD	Control n	p value	Additional information
Kacerovsky	2013	Czech Republic	24.0-36.6 weeks	pPROM was defined as the leakage of amniotic fluid prior to the onset of labor (by at least 2 h). This condition was diagnosed visually using a sterile speculum examition to confirm pooling of amniotic fluid in the vagina and a positive test for the presence of insulin-like growth factor-binding protein (Actim PROM test; Medix Biochemica, Kauniainen,Finland) in the vaginal fluid	AF	Luminex xMAP technology	first-trimester ultrasound evaluation	Adiponectin	pg/mL	94															NO			NO
Allen-Daniels	2015	USA	24-34.6 weeks	NO INFORMATION	VF	REAL TIME PCR	NO INFORMATION	alr gene		-								NO			NO
YOON	2001	KOREA	mid-trimester genetic amniocentesis	spontaneous preterm delivery (<32 weeks)	AF	ELISA	NO INFORMATION	Angiogenic	pg/mL	114								11000.1	4500-30700	19	6000.7	1300-21900	95	<0.001
Kacerovsky	2013	Czech Republic	24.0-36.6 weeks	pPROM was defined as the leakage of amniotic fluid prior to the onset of labor (by at least 2 h). This condition was diagnosed visually using a sterile speculum examition to confirm pooling of amniotic fluid in the vagina and a positive test for the presence of insulin-like growth factor-binding protein (Actim PROM test; Medix Biochemica, Kauniainen,Finland) in the vaginal fluid	AF	Luminex xMAP technology	first-trimester ultrasound evaluation	BDNF	pg/mL	94															NO			NO
Kacerovsky	2012	Czech Republic	24-31.6 weeks	PPROM was defined as the leakage of amniotic fluid prior to the onset of labor (by at least 2 h). This condition was diagnosed visually using a sterile speculum examition to confirm pooling of amniotic fluid in the vagina together with a positive test for the presence of insulin-like growth factor-binding protein (ACTIM PROM test; Medix Biochemica, Kauniainen, Finland) in the vaginal fluid.	AF	Luminex xMAP technology	e first trimester ultrasound evaluation	BDNF	pg/mL	115															247.0	10.0–930.0	24	176.5	42.0-481.0	18	0.21	* PPROM with MIAC vs WITHOUT MIAC
Kacerovsky	2012	Czech Republic	32-36.6 weeks	PPROM was defined as the leakage of amniotic fluid prior to the onset of labor (by at least 2 h). This condition was diagnosed visually using a sterile speculum examition to confirm pooling of amniotic fluid in the vagina together with a positive test for the presence of insulin-like growth factor-binding protein (ACTIM PROM test; Medix Biochemica, Kauniainen, Finland) in the vaginal fluid.	AF	Luminex xMAP technology	e first trimester ultrasound evaluation	BDNF	pg/mL	115															128.0	10.0-360.0	24	94.5	10.0-404.0	18	0.24	* PPROM with MIAC vs WITHOUT MIAC
Kacerovsky	2012	Czech Republic	24-31.6 weeks	PPROM was defined as the leakage of amniotic fluid prior to the onset of labor (by at least 2 h). This condition was diagnosed visually using a sterile speculum examition to confirm pooling of amniotic fluid in the vagina together with a positive test for the presence of insulin-like growth factor-binding protein (ACTIM PROM test; Medix Biochemica, Kauniainen, Finland) in the vaginal fluid.	AF	Luminex xMAP technology	e first trimester ultrasound evaluation	CCL2	pg/mL	115															824.0 *	50.0-2500.0	24	265.0 *	75.0-1131.0	18	0.03	* PPROM with MIAC vs WITHOUT MIAC
Kacerovsky	2012	Czech Republic	32-36.6 weeks	PPROM was defined as the leakage of amniotic fluid prior to the onset of labor (by at least 2 h). This condition was diagnosed visually using a sterile speculum examition to confirm pooling of amniotic fluid in the vagina together with a positive test for the presence of insulin-like growth factor-binding protein (ACTIM PROM test; Medix Biochemica, Kauniainen, Finland) in the vaginal fluid.	AF	Luminex xMAP technology	e first trimester ultrasound evaluation	CCL2	pg/mL	115															196.0	38.0-2500.0	24	138.5	37.0-1131.0	18	0.43	* PPROM with MIAC vs WITHOUT MIAC
Kacerovsky	2012	Czech Republic	24-31.6 weeks	PPROM was defined as the leakage of amniotic fluid prior to the onset of labor (by at least 2 h). This condition was diagnosed visually using a sterile speculum examition to confirm pooling of amniotic fluid in the vagina together with a positive test for the presence of insulin-like growth factor-binding protein (ACTIM PROM test; Medix Biochemica, Kauniainen, Finland) in the vaginal fluid.	AF	Luminex xMAP technology	e first trimester ultrasound evaluation	CCL3	pg/mL	115															345.5 *	18.0-6355.0	24	57.5 *	11.0-176.0	18	0.001	* PPROM with MIAC vs WITHOUT MIAC
Kacerovsky	2012	Czech Republic	32-36.6 weeks	PPROM was defined as the leakage of amniotic fluid prior to the onset of labor (by at least 2 h). This condition was diagnosed visually using a sterile speculum examition to confirm pooling of amniotic fluid in the vagina together with a positive test for the presence of insulin-like growth factor-binding protein (ACTIM PROM test; Medix Biochemica, Kauniainen, Finland) in the vaginal fluid.	AF	Luminex xMAP technology	e first trimester ultrasound evaluation	CCL3	pg/mL	115															68.0	4.0-2292.0	24	43.5	4.0-666.0	18	0.03	* PPROM with MIAC vs WITHOUT MIAC
LEE	2013	KOREA	20-34 weeks	Preterm labor was defined as the presence of regular uterine contractions with a frequency of at least two every 10 min and cervical change before 37 completed weeks of gestation that required ; Rupture of membranes was diagnosed by a sterile speculum examition confirming pooling of AF in the vagina and a positive nitrazine test.	AF	Turbidimetric immunoassay	NO INFORMATION	CRP	mg/L	237	NO			NO				NO			NO				27.2	21.8	10	9.2	15.7	227	0.002	control is without rupture of membranes after 48h amniocentesis
Park	2013	KOREA	<34 weeks	NO INFORMATION	CB	ELISA	NO INFORMATION	CRP		81	969300 *	760-6773100	34	NO				NO			NO				396900 *	4900-4885500	47	NO				*PTL was associated with a higher median concentration at birth than preterm-PROM, in the context of acute-HCA with funisitis
Kacerovsky	2013	Czech Republic	24.0-36.6 weeks	pPROM was defined as the leakage of amniotic fluid prior to the onset of labor (by at least 2 h). This condition was diagnosed visually using a sterile speculum examition to confirm pooling of amniotic fluid in the vagina and a positive test for the presence of insulin-like growth factor-binding protein (Actim PROM test; Medix Biochemica, Kauniainen,Finland) in the vaginal fluid	AF	Luminex xMAP technology	first-trimester ultrasound evaluation	CRP	pg/mL	94															NO			NO
Kacerovsky	2012	Czech Republic	24-31.6 weeks	pPROM was defined as the leakage of amniotic fluid prior to the onset of labor (by at least 2 h). This condition was diagnosed visually using a sterile speculum examition to confirm pooling of amniotic fluid in the vagina and a positive test for the presence of insulin-like growth factor-binding protein (Actim PROM test; Medix Biochemica, Kauniainen,Finland) in the vaginal fluid	AF	Luminex xMAP technology	e first trimester ultrasound evaluation	CRP	pg/mL	115															2926.5	162.0-17786.0	24	1816.0	223.0-20756.0	18	0.21	* PPROM with MIAC vs WITHOUT MIAC
Kacerovsky	2012	Czech Republic	32-36.6 weeks	pPROM was defined as the leakage of amniotic fluid prior to the onset of labor (by at least 2 h). This condition was diagnosed visually using a sterile speculum examition to confirm pooling of amniotic fluid in the vagina and a positive test for the presence of insulin-like growth factor-binding protein (Actim PROM test; Medix Biochemica, Kauniainen,Finland) in the vaginal fluid	AF	Luminex xMAP technology	e first trimester ultrasound evaluation	CRP	pg/mL	115															2230.0	4.0-2292.0	24	2392.0	339.0-24601.0	18	0.86	* PPROM with MIAC vs WITHOUT MIAC
Carroll	1995	UK	NO INFORMATION	amniorrhexis was confirmed by US demonstration ofdecreased or absent AF and the visualization of nitrazine-positive fluid in the vagina	AF	nephelometric assay	ultrasound scan in early pregncy	CRP	mg/L	75															6.7	1.6-76.1	18	4.6	0.7-94.2	45	<0.05	*PPROM AF positive culture x negative culture
Musilova	2017	Czech Republic	24-36.6 weeks	PPROM was defined as the leakage of amniotic fluid prior to the onset of labor and was diagnosed visually by using a sterile speculum examition to confirm the pooling of amniotic fluid in the vagina. In case of clinical doubt, PPROM was confirmed by the presence of insulin-like growth factor–binding protein (ACTIM PROM test; Medix Biochemica, Kauniainen,Finland) in the vaginal fluid.	MS	high-sensitivity immunoturbidimetric assay	first trimester ultrasound scan	CRP	mg/L	287															6.9 *	3.0–16.1	69	4.9 *	2.4–7.8	218	0.02	*PPROM with MIAC compared to without MIAC
Stepan	2016	Czech Republic	24-36.6 weeks	PPROM was defined as the leakage of amniotic fluid prior to the onset of labor and was diagnosed visually by using a sterile speculum examition to confirm the pooling of amniotic fluid in the vagina. In case of clinical doubt, PPROM was confirmed by the presence of insulin-like growth factor–binding protein (ACTIM PROM test; Medix Biochemica, Kauniainen,Finland) in the vaginal fluid.	MS	high-sensitivity immunoturbidimetric alysis	first trimester ultrasound scan	CRP	mg/L	386															4.3*	2.1–9.3	32	4.5 *	2–8.5	116	<0.0001	*PPROM with MIAC compared to without MIAC
Musilova	2017	Czech Republic	24-36.6 weeks	PPROM was defined as the leakage of amniotic fluid prior to the onset of labor and was diagnosed visually by using a sterile speculum examition to confirm the pooling of amniotic fluid in the vagina. In case of clinical doubt, PPROM was confirmed by the presence of insulin-like growth factor–binding protein (ACTIM PROM test; Medix Biochemica, Kauniainen,Finland) in the vaginal fluid.	MS	high-sensitivity immunoturbidimetric assay	first trimester ultrasound scan	CRP	mg/L	479															4.3*	0-28.9	62	11.9*	4.9	0-47.5	<0.0001	*PPROM with MIAC compared to without MIAC
OH	2019	KOREA	< 37 weeks	NO INFORMATION	MB	hemocytometer chamber	NO INFORMATION	CRP	mg/dL	73															1.3	0.7–3.1	17	0.9	0.2-2.0	15	0.146	* extreme PPROM (<26w, vs late PPROM(34-36.9w)
Kacerovsky	2012	Czech Republic	24-31.6 weeks	PPROM was defined as the leakage of amniotic fluid prior to the onset of labor (by at least 2 h). This condition was diagnosed visually using a sterile speculum examition to confirm pooling of amniotic fluid in the vagina together with a positive test for the presence of insulin-like growth factor-binding protein (ACTIM PROM test; Medix Biochemica, Kauniainen, Finland) in the vaginal fluid.	AF	Luminex xMAP technology	e first trimester ultrasound evaluation	CXCL8	pg/mL	115															425.0	12.0–4000.0	24	65.0	4.0–4000.0	18	0.06	* PPROM with MIAC vs WITHOUT MIAC
Kacerovsky	2012	Czech Republic	32-36.6 weeks	PPROM was defined as the leakage of amniotic fluid prior to the onset of labor (by at least 2 h). This condition was diagnosed visually using a sterile speculum examition to confirm pooling of amniotic fluid in the vagina together with a positive test for the presence of insulin-like growth factor-binding protein (ACTIM PROM test; Medix Biochemica, Kauniainen, Finland) in the vaginal fluid.	AF	Luminex xMAP technology	e first trimester ultrasound evaluation	CXCL8	pg/mL	115															77.0	4.0-4000.0	24	74.5	4.0-2411.0	18	0.39	* PPROM with MIAC vs WITHOUT MIAC
WOOD	2019	USA	second trimester	NO INFORMATION	VF	multiplex Luminex assay	last menstrual period and ultrasound Data	Emmprin	pg/mL	119	NO			NO				NO			NO											EVALUATED MG AND MH TOGETHER
YOON	2001	KOREA	23-31 weeeks	PTD: <34 weeks of gestation	CS	ELISA	NO INFORMATION	Fetal fibronectin	pg/mL	54								509000	260000->1000000	47	155000*	50000-889000	7	<0.01								* > 34 weeks vc <34weeks
COBO	2017	SPAIN	22.0-36.0 weeks	PTL was defined as the presence of regular uterine contractions with a frequency of at least 2 every 10 minutes and a cervical length measured by transvaginal ultrasound less than 25 mm in women with PTL below 8.0 weeks; less than 20 mm between 28.0-31.6 weeks and less than 15 mm above 32.0 weeks of gestation	AF	ELISA	first-trimester ultrasound scan	Glucose	mL/dL	170	NO			NO																		* (IQR: 25th; 75th percentile)
Rodriguez-trujillo	2016	Spain	22.0–34.0 weeks	PPROM was defined as leakage of amniotic fluid preceding the onset of uterine contractions. It was diagnosed by sterile speculum examition to identify pooling of amniotic fluid in the vagina, and confirmed by alkaline pH. Biochemical tests such as insulin-like growth factor binding protein-1 or placental a-microglobulin-1 were performed in the posterior vaginal fornix to confirm suspected PPROM	AF	NO INFORMATION	first-trimester ultrasound scan	Glucose	pg/mL	91								NO			NO				NO			NO
Yoneda	2018	JAPAN	20-29 weeks	Preterm labor was defined by the presence of regular uterine contractions (6 hour or more), cervical changes of more than 50% effaced, and dilatation of the cervix or shortening of the cervical length to less than 25 mm before 37 completed weeks of gestation	AF	NO INFORMATION	last menstrual period or ultrasound findings of the crown-rump length (CRL) size between 8 and 10 weeks	Glucose	mg/dL	105	35*	2.0-91.0	19	37	8.0-84.0	86	0.676
ROMERO	2015	USA	20-35 weeks	Preterm prelabor rupture of membranes was diagnosed with a sterile speculum examition with documentation of pooling of amniotic fluid in the vagina in association with a positive nitrazine test and/or and positive ferning tests when necessary	AF	NO INFORMATION	Last menstrual period and confirmed by ultrasound examition, or by ultrasound examition alone if the sonographic determition of gestatiol age was not consistent with menstrual dating	Glucose	mg/dL	59															13.0*	10.0-22.0	17	25.0	13.5-31.7	18	0.02	*Comparison between PPROM with microbial-associated intra-amniotic inflammation and no inflammation/infection
Kacerovsky	2013	Czech Republic	24.0-36.6 weeks	pPROM was defined as the leakage of amniotic fluid prior to the onset of labor (by at least 2 h). This condition was diagnosed visually using a sterile speculum examition to confirm pooling of amniotic fluid in the vagina and a positive test for the presence of insulin-like growth factor-binding protein (Actim PROM test; Medix Biochemica, Kauniainen,Finland) in the vaginal fluid	AF	Luminex xMAP technology	first-trimester ultrasound evaluation	GM-CSF	pg/mL	94															NO			NO
Kacerovsky	2012	Czech Republic	24-31.6 weeks	PPROM was defined as the leakage of amniotic fluid prior to the onset of labor (by at least 2 h). This condition was diagnosed visually using a sterile speculum examition to confirm pooling of amniotic fluid in the vagina together with a positive test for the presence of insulin-like growth factor-binding protein (ACTIM PROM test; Medix Biochemica, Kauniainen, Finland) in the vaginal fluid.	AF	Luminex xMAP technology	e first trimester ultrasound evaluation	GM-CSF	pg/mL	115															34.5	4.0-161.0	24	19.5	4.0-33.0	18	0.10	* PPROM with MIAC vs WITHOUT MIAC
Kacerovsky	2012	Czech Republic	32-36.6 weeks	PPROM was defined as the leakage of amniotic fluid prior to the onset of labor (by at least 2 h). This condition was diagnosed visually using a sterile speculum examition to confirm pooling of amniotic fluid in the vagina together with a positive test for the presence of insulin-like growth factor-binding protein (ACTIM PROM test; Medix Biochemica, Kauniainen, Finland) in the vaginal fluid.	AF	Luminex xMAP technology	e first trimester ultrasound evaluation	GM-CSF	pg/mL	115															18.7	8.5-190.0	24	19.3	4.8-159.4	18	0.46	* PPROM with MIAC vs WITHOUT MIAC
Allen-Daniels	2015	USA	24-34.6 weeks	NO INFORMATION	VF	REAL TIME PCR	NO INFORMATION	goiB gene		-								NO			NO
Allen-Daniels	2015	USA	24-34.6 weeks	NO INFORMATION	VF	REAL TIME PCR	NO INFORMATION	goiC gene		17								100% *		4	30% *		13	<.05								*positive or negative for the studied gene
Veleminsky	2008	Czech Republic	second and third trimester	PROM after 37th week of gestation, pPROM before the end of the 37th week,females delivering after the 38th week, without PROM	UC	NO INFORMATION	NO INFORMATION	ICAM-1		152															>300000			NO			0.024	*number os samples with pathologic levels of cytokines
Kacerovsky	2013	Czech Republic	24.0-36.6 weeks	pPROM was defined as the leakage of amniotic fluid prior to the onset of labor (by at least 2 h). This condition was diagnosed visually using a sterile speculum examition to confirm pooling of amniotic fluid in the vagina and a positive test for the presence of insulin-like growth factor-binding protein (Actim PROM test; Medix Biochemica, Kauniainen,Finland) in the vaginal fluid	AF	Luminex xMAP technology	first-trimester ultrasound evaluation	IGFBP-1	pg/mL	94															NO			NO
Kacerovsky	2012	Czech Republic	24-31.6 weeks	PPROM was defined as the leakage of amniotic fluid prior to the onset of labor (by at least 2 h). This condition was diagnosed visually using a sterile speculum examition to confirm pooling of amniotic fluid in the vagina together with a positive test for the presence of insulin-like growth factor-binding protein (ACTIM PROM test; Medix Biochemica, Kauniainen, Finland) in the vaginal fluid.	AF	Luminex xMAP technology	e first trimester ultrasound evaluation	IGFBP-1	pg/mL	115															33700	6200-175100	24	31.0	15.8-172.7	18	0.61	* PPROM with MIAC vs WITHOUT MIAC
Kacerovsky	2012	Czech Republic	32-36.6 weeks	PPROM was defined as the leakage of amniotic fluid prior to the onset of labor (by at least 2 h). This condition was diagnosed visually using a sterile speculum examition to confirm pooling of amniotic fluid in the vagina together with a positive test for the presence of insulin-like growth factor-binding protein (ACTIM PROM test; Medix Biochemica, Kauniainen, Finland) in the vaginal fluid.	AF	Luminex xMAP technology	e first trimester ultrasound evaluation	IGFBP-1	pg/mL	115															29500	11900-41700	24	30000	6400-43300	18	0.99	* PPROM with MIAC vs WITHOUT MIAC
Kacerovsky	2013	Czech Republic	24.0-36.6 weeks	pPROM was defined as the leakage of amniotic fluid prior to the onset of labor (by at least 2 h). This condition was diagnosed visually using a sterile speculum examition to confirm pooling of amniotic fluid in the vagina and a positive test for the presence of insulin-like growth factor-binding protein (Actim PROM test; Medix Biochemica, Kauniainen,Finland) in the vaginal fluid	AF	Luminex xMAP technology	first-trimester ultrasound evaluation	IGFBP-3	pg/mL	94															NO			NO
Kacerovsky	2012	Czech Republic	24-31.6 weeks	PPROM was defined as the leakage of amniotic fluid prior to the onset of labor (by at least 2 h). This condition was diagnosed visually using a sterile speculum examition to confirm pooling of amniotic fluid in the vagina together with a positive test for the presence of insulin-like growth factor-binding protein (ACTIM PROM test; Medix Biochemica, Kauniainen, Finland) in the vaginal fluid.	AF	Luminex xMAP technology	e first trimester ultrasound evaluation	IGFBP-3	pg/mL	115															34800	17200-44300	24	35500	7200-41400	18	0.59	* PPROM with MIAC vs WITHOUT MIAC
Kacerovsky	2012	Czech Republic	32-36.6 weeks	PPROM was defined as the leakage of amniotic fluid prior to the onset of labor (by at least 2 h). This condition was diagnosed visually using a sterile speculum examition to confirm pooling of amniotic fluid in the vagina together with a positive test for the presence of insulin-like growth factor-binding protein (ACTIM PROM test; Medix Biochemica, Kauniainen, Finland) in the vaginal fluid.	AF	Luminex xMAP technology	e first trimester ultrasound evaluation	IGFBP-3	pg/mL	115															33100	11900-41700	24	33300	10700-41000	18	0.97	* PPROM with MIAC vs WITHOUT MIAC
Kacerovsky	2013	Czech Republic	24.0-36.6 weeks	pPROM was defined as the leakage of amniotic fluid prior to the onset of labor (by at least 2 h). This condition was diagnosed visually using a sterile speculum examition to confirm pooling of amniotic fluid in the vagina and a positive test for the presence of insulin-like growth factor-binding protein (Actim PROM test; Medix Biochemica, Kauniainen,Finland) in the vaginal fluid	AF	Luminex xMAP technology	first-trimester ultrasound evaluation	IL-10	pg/mL	94															NO			NO
Kacerovsky	2012	Czech Republic	24-31.6 weeks	PPROM was defined as the leakage of amniotic fluid prior to the onset of labor (by at least 2 h). This condition was diagnosed visually using a sterile speculum examition to confirm pooling of amniotic fluid in the vagina together with a positive test for the presence of insulin-like growth factor-binding protein (ACTIM PROM test; Medix Biochemica, Kauniainen, Finland) in the vaginal fluid.	AF	Luminex xMAP technology	e first trimester ultrasound evaluation	IL-10	pg/mL	115															63.5 *	4.0–2199.0	24	20 *	4.0–63.0)	18	0.01	* PPROM with MIAC vs WITHOUT MIAC
Kacerovsky	2012	Czech Republic	32-36.6 weeks	PPROM was defined as the leakage of amniotic fluid prior to the onset of labor (by at least 2 h). This condition was diagnosed visually using a sterile speculum examition to confirm pooling of amniotic fluid in the vagina together with a positive test for the presence of insulin-like growth factor-binding protein (ACTIM PROM test; Medix Biochemica, Kauniainen, Finland) in the vaginal fluid.	AF	Luminex xMAP technology	e first trimester ultrasound evaluation	IL-10	pg/mL	115															19.0	4.0-514.0	24	15.0	4.0-93.0	18	0.17	* PPROM with MIAC vs WITHOUT MIAC
Jacobsson	2009	SWEDEN	22-34 weeks	We defined PTL as regular uterinecontractions (at least two uterine contractions/10 minutes for]30 minutes) in combition withone of the following cervical changes: (1)52cmLength at endovaginal ultrasound with ]1 cm dilata-tion, (2) 52 cm length with cervical softening, (3)]1 cm dilatation with cervical softening or cervicallengthB30 mm. pPROM was defined as visibleamniotic fluid with neutral pH i…	AF	ELISA	NO INFORMATION	IL-10	pg/mL	197																						* mean calculated from individual values
Payne	2014	AUSTRALIA	15-20 weeks	NO INFORMATION	AF	multiplex - MilliPlex MAGPIX	ultrasound imaging and biometryin the first or early second trimester	IL-10	pg/mL	972																						differences in Chinese samples, not Australian
Athayde	2000	USA AND CHILE	mid and thrid-trimester	Premature rupture of membranes was defined as amniorrhexis before the onset of spontaneous labor. Membrane rupture was diagnosed if one of the following tests yielded a positive result: vaginal pooling, ferning, or Nitrazine Test Paper. Preterm labor was defined as the presence of regular uterine contractions occurring with a minimum frequency of 2 every 10 minutes accompanied by changes in eithe…	AF	ELISA	NO INFORMATION	IL-16	pg/mL	230	328.1			119.8	<25-558.5	21	<0.001	321.5	146.9-1185.8	25	85.9*	<25-409.8	25	<0.01	1005.8	<25-4590	29	204.9 *	42.6-2347	23	<0.05	*miac X PRETERM CONTROL / PPROM WITH/WITHOUT MIAC
Daskalakis	2009	GREECE	mid-trimester genetic amniocentesis	Pregncy outcomes were obtained by assessing labour and delivery records or by contacting the patient’s private physician if the delivery was not in our hospital	AF	ELISA	last menstrual period or by an early ultrasound scan if there was a discrepancy of more than a week	IL-18	pg/mL	144	NO			NO				609	445.7-782.7	48	322.1	277.7-414.4	96	<0.001								interquartile range
Jacobsson	2003	SWEDEN	<34 weeks	Preterm labour was defined as regular uterine contractions (at least two uterine contractions/10 minutes during 30 minutes) in combition with cervical changes at admittance to the clinic: 1. 2 cm length þ 1 cm dilatation or 2. 2 cm length þ cervical softening or 3. 1 cm dilatation þ cervical softening or 4. cervical length <30 mm at endovaginal ultrasound. Preterm prelabour rupture of membranes w…	AF	ELISA	routine ultrasound in the second trimester (16th to 19th weeks of gestation)	IL-18	pg/mL	134	590	NO	59	150	NO	28	0.004
Jacobsson	2003	SWEDEN	<34 weeks	Preterm labour was defined as regular uterine contractions (at least two uterine contractions/10 minutes during 30 minutes) in combition with cervical changes at admittance to the clinic: 1. 2 cm length þ 1 cm dilatation or 2. 2 cm length þ cervical softening or 3. 1 cm dilatation þ cervical softening or 4. cervical length <30 mm at endovaginal ultrasound. Preterm prelabour rupture of membranes w…	CM	ELISA	routine ultrasound in the second trimester (16th to 19th weeks of gestation)	IL-18	pg/mL	134	510	NO	87	150	NO	28	<0.001
AMABEBE	2019	UK	19-36+6 weeks	PTL: regular uterine contractions (at least once every 10 mins) and cervical dilatation <3 cm, intact fetal membranes and no clinical evidence of genitouriry tract infection, abnormal cervical cytology or vaginal bleeding	CVF	multiplexed bead-based immunoassay	NO INFORMATION	IL-1α	pg/mL	94	NO			NO				1062.4	397.6-1816.5*	17	546.2	218.7-935.5*	62	0.3								* (IQR: 25th; 75th percentile)
Figueroa	2005	USA	21-35 weeks	Preterm labor was defined as six to eight uterine contractions in one hour or four contractions in 20 minutes, associated with cervical dilatation or effacement	AF	ELISA	last menstrual period and first or second trimester obstetrical ultrasound evaluations	IL-1α	pg/mL	43	125*	20-3707	23	35*	20-274	20	<0.05	NO			NO											*Women with preterm labor and intact membranes that delivered within 7 days had higher AF concentrations of pro-inflammatory cytokines than those who delivered after 7 days of the amniocentesis regardless of the AF culture results
Romero	1992	USA	mid and thrid-trimester	PROM was defined as amniorrhexis before the onset of spontaneous labor. Nitrazine, pooling, and feming tests were performed in all women in labor to exclude leakage of AF into the vagina.Preterm labor was defined as the presence of regular uterine contractions with a frequency of at least two every 10 min associated with changes in the cervical Bishop's score. Ritodrine was administered intraveno…	AF	radioimmunoassay	NO INFORMATION	IL-1α	pg/mL	233	10000*	215-18000	15	201*	50-5000	9	<0.001															PTL and term control WITH infection
Foulon, W	1995	Belgium	20-34 weeks	intact fetal membranes; regular uterine contractions of at least one in 10 minutes; and a cervical dilation less than 3 cm.	UC	ELISA	first-trimester fetal biometry	IL-1α	pg/mL	44								>15			NO											early (<34 weeks) x late (>34 weekes) preterm
MARCONI	2011	BRAZIL	third trimester	PTL: less than 37 weeks of gestation, presence of regular uterine contractions each 10 min or less and cervical effacement equal or superior to 50% confirmed by two observers and ⁄ or cervical dilatation of at least 2 cm	AF	ELISA	ultrasound before 20 weeks	IL-1β	pg/ml	40	43	13-100.2	20	<13		20	0.03
AMABEBE	2019	UK	19-36+6 weeks	PTL: regular uterine contractions (at least once every 10 mins) and cervical dilatation <3 cm, intact fetal membranes and no clinical evidence of genitouriry tract infection, abnormal cervical cytology or vaginal bleeding	CVF	multiplexed bead-based immunoassay	NO INFORMATION	IL-1β	pg/mL	94	NO			NO				785.6	133.5-1653.4*	9	369.5	69.4-760.8*	61	0.2								* (IQR: 25th; 75th percentile)
PERNI	2004	USA	15-19 weeks	PPROM was defined as the rupture of the chorioamniotic membrane before the onset of labor at 37 weeks of gestation. Spontaneous preterm birth was defined as birth at !37 weeks of gestation preceded by preterm labor with intact membranes.	AF	ELISA	NO INFORMATION	IL-1β	pg/mL	179	NO			NO				NO			NO				NO			NO				*in PPROM MH+
Figueroa	2005	USA	21-35 weeks	Preterm labor was defined as six to eight uterine contractions in one hour or four contractions in 20 minutes, associated with cervical dilatation or effacement	AF	ELISA	last menstrual period and first or second trimester obstetrical ultrasound evaluations	IL-1β	pg/mL	43	20*	20-1297	23	20*	20-258	20	NS	NO			NO
Romero	1992	USA	mid and thrid-trimester	PROM was defined as amniorrhexis before the onset of spontaneous labor. Nitrazine, pooling, and feming tests were performed in all women in labor to exclude leakage of AF into the vagina.Preterm labor was defined as the presence of regular uterine contractions with a frequency of at least two every 10 min associated with changes in the cervical Bishop's score. Ritodrine was administered intraveno…	AF	radioimmunoassay	NO INFORMATION	IL-1β	pg/mL	233	3500*	<157-8900	15	0*	<157-3592	9	<0.001
Yoon, B H	1998	KOREA	≤36 weeks	Rupture of membranes was diagnosed by sterile speculum examition confirming pooling, Nitrazine paper reaction, and ferning	AF	ELISA	NO INFORMATION	IL-1β	pg/mL	120																						PPROM SAMPLES
Jacobsson	2009	SWEDEN	22-34 weeks	We defined PTL as regular uterinecontractions (at least two uterine contractions/10 minutes for]30 minutes) in combition withone of the following cervical changes: (1)52cmLength at endovaginal ultrasound with ]1 cm dilata-tion, (2) 52 cm length with cervical softening, (3)]1 cm dilatation with cervical softening or cervicallengthB30 mm. pPROM was defined as visibleamniotic fluid with neutral pH i…	AF	ELISA	NO INFORMATION	IL-1β	pg/mL	197																						* mean calculated from individual values
WOOD	2019	USA	second trimester	NO INFORMATION	VF	multiplex Luminex assay	last menstrual period and ultrasound Data	IL-1β	pg/mL	119	NO			NO				NO			NO											EVALUATED MG AND MH TOGETHER
BARTON	2003	USA	first trimester	NO INFORMATION	Posterior vaginal walls	ELISA	NO INFORMATION	IL-1ra	pg/mL	207	NO			NO				NO			NO				NO			NO
PERNI	2004	USA	15-19 weeks	PPROM was defined as the rupture of the chorioamniotic membrane before the onset of labor at 37 weeks of gestation. Spontaneous preterm birth was defined as birth at !37 weeks of gestation preceded by preterm labor with intact membranes.	AF	ELISA	NO INFORMATION	IL-1ra	pg/mL	179	NO			NO				NO			NO				NO			NO
PERNI	2004	USA	15-19 weeks	PPROM was defined as the rupture of the chorioamniotic membrane before the onset of labor at 37 weeks of gestation. Spontaneous preterm birth was defined as birth at !37 weeks of gestation preceded by preterm labor with intact membranes.	AF	ELISA	NO INFORMATION	IL-4	pg/mL	179	NO			NO				NO			NO				92.0 *	NO	2	2.5	NO	NO		*in PPROM MH+
MARCONI	2011	BRAZIL	third trimester	PTL: less than 37 weeks of gestation, presence of regular uterine contractions each 10 min or less and cervical effacement equal or superior to 50% confirmed by two observers and ⁄ or cervical dilatation of at least 2 cm	AF	ELISA	ultrasound before 20 weeks	IL-6	pg/ml	40	135	27.6-182.3	20	43.8	1.1-84.3	20	<0.001
YOON	2001	KOREA	mid-trimester genetic amniocentesis	spontaneous preterm delivery (<32 weeks)	AF	ELISA	NO INFORMATION	IL-6	pg/mL	114								320	40-2520	19	180	10-1810	95	<0.01
BASHIRI	2009	ISRAEL	17–20 weeks	NO INFORMATION	AF	ELISA	NO INFORMATION	IL-6	pg/mL	26	NO			NO				n=1			NO				NO			NO
COBO	2017	SPAIN	22.0-36.0 weeks	PTL was defined as the presence of regular uterine contractions with a frequency of at least 2 every 10 minutes and a cervical length measured by transvaginal ultrasound less than 25 mm in women with PTL below 8.0 weeks; less than 20 mm between 28.0-31.6 weeks and less than 15 mm above 32.0 weeks of gestation	AF	ELISA	first-trimester ultrasound scan	IL-6	pg/mL	170	NO			NO																		* (IQR: 25th; 75th percentile)
AMABEBE	2019	UK	19-36+6 weeks	PTL: regular uterine contractions (at least once every 10 mins) and cervical dilatation <3 cm, intact fetal membranes and no clinical evidence of genitouriry tract infection, abnormal cervical cytology or vaginal bleeding	CVF	multiplexed bead-based immunoassay	NO INFORMATION	IL-6	pg/mL	94	NO			NO				207.6	47.1-524.5*	13	38.3	6.1-147.2*	47	0.01								* (IQR: 25th; 75th percentile)
LEE	2013	KOREA	20-34 weeks	Preterm labor was defined as the presence of regular uterine contractions with a frequency of at least two every 10 min and cervical change before 37 completed weeks of gestation that required ; Rupture of membranes was diagnosed by a sterile speculum examition confirming pooling of AF in the vagina and a positive nitrazine test. hospitalization	AF	Turbidimetric immunoassay	NO INFORMATION	IL-6	pg/ml	237	NO			NO				NO			NO				33300	45100	10	4200	12300	227	<0.001	control is without rupture of membranes after 48h amniocentesis
PERNI	2004	USA	15-19 weeks	PPROM was defined as the rupture of the chorioamniotic membrane before the onset of labor at 37 weeks of gestation. Spontaneous preterm birth was defined as birth at !37 weeks of gestation preceded by preterm labor with intact membranes.	AF	ELISA	NO INFORMATION	IL-6	pg/mL	179	NO			NO				NO			NO				NO			NO
WOOD	2019	USA	second trimester	NO INFORMATION	VF	multiplex Luminex assay	last menstrual period and ultrasound Data	IL-6	pg/mL	119	NO			NO				NO			NO											EVALUATED MG AND MH TOGETHER
Thomakos	2009	GREECE	mid-trimester genetic amniocentesis	Pregncy outcomes were obtained by assessing labour and delivery records or by contacting the patient’s private physician if the delivery was not in our hospital	AF	ELISA	last menstrual period or by an early ultrasound scan if there was a discrepancy of more than a week	IL-6	pg/mL	144	NO			NO				176.3	130.6-208.6	48	52.3	37.2-92.3	96	<0.001								interquartile range
Kacerovsky	2013	Czech Republic	24.0-36.6 weeks	pPROM was defined as the leakage of amniotic fluid prior to the onset of labor (by at least 2 h). This condition was diagnosed visually using a sterile speculum examition to confirm pooling of amniotic fluid in the vagina and a positive test for the presence of insulin-like growth factor-binding protein (Actim PROM test; Medix Biochemica, Kauniainen,Finland) in the vaginal fluid	AF	Luminex xMAP technology	first-trimester ultrasound evaluation	IL-6	pg/mL	94															NO			NO
Kim	2003	KOREA	<37 weeks	Preterm labor was defined as the presence of regular uterine contractions with a frequency of at least two every 10 minutes and cervical change. Rupture of membranes was diagnosed by sterile speculum examition confirming pooling of amniotic fluid in the vagina, a positive Nitrazine paper test result, and a positive ferning test result	AF	ELISA	NO INFORMATION	IL-6	pg/ml	77	NO			NO				NO			NO				NO			NO				*UU BIOVAR PARVO COMPARED TO T960
Figueroa	2005	USA	21-35 weeks	Preterm labor was defined as six to eight uterine contractions in one hour or four contractions in 20 minutes, associated with cervical dilatation or effacement	AF	ELISA	last menstrual period and first or second trimester obstetrical ultrasound evaluations	IL-6	pg/mL	43	3735*	401-232000	23	1212*	98-22615	20	<0.05	NO			NO											*Women with preterm labor and intact membranes that delivered within 7 days had higher AF concentrations of pro-inflammatory cytokines than those who delivered after 7 days of the amniocentesis regardless of the AF culture results
Rodriguez-trujillo	2016	Spain	22.0–34.0 weeks	PPROM was defined as leakage of amniotic fluid preceding the onset of uterine contractions. It was diagnosed by sterile speculum examition to identify pooling of amniotic fluid in the vagina, and confirmed by alkaline pH. Biochemical tests such as insulin-like growth factor binding protein-1 or placental a-microglobulin-1 were performed in the posterior vaginal fornix to confirm suspected PPROM	AF	ELISA	first-trimester ultrasound scan	IL-6	pg/mL	91								NO			NO				NO			NO
Holst	2005	SWEDEN	22-33,6 weeks	PTL was defined as regular uterine contractions at a frequency of at least 2 uterine contractions/10 min for 30 min (confirmed by exterl tocometry) in combition with documented cervical ripening ( 2 cm length þ 1 cm dilatation or 2 cm length þ cervical softening or 1 cm dilatation þ cervical softening or cervical length <30 mm measured by vaginal ultrasound)	AF	ELISA	routine ultrasound in the second trimester (16th to 19th weeks of gestation)	IL-6	pg/mL	56	660	NO	25	810	NO	29	0.013	8540*			340*											*PTB <34 weeks and delivery <7 days CONTROL 34 weeks and delivery > 7 days
Holst	2005	SWEDEN	22-33,6 weeks	PTL was defined as regular uterine contractions at a frequency of at least 2 uterine contractions/10 min for 30 min (confirmed by exterl tocometry) in combition with documented cervical ripening ( 2 cm length þ 1 cm dilatation or 2 cm length þ cervical softening or 1 cm dilatation þ cervical softening or cervical length <30 mm measured by vaginal ultrasound)	CF	ELISA	routine ultrasound in the second trimester (16th to 19th weeks of gestation)	IL-6	pg/mL	89	7100	150-314000		800	150-6600		0.03															*PTB <34 weeks and delivery <7 days CONTROL 34 weeks and delivery > 7 days
Kacerovsky	2012	Czech Republic	24-31.6 weeks	PPROM was defined as the leakage of amniotic fluid prior to the onset of labor (by at least 2 h). This condition was diagnosed visually using a sterile speculum examition to confirm pooling of amniotic fluid in the vagina together with a positive test for the presence of insulin-like growth factor-binding protein (ACTIM PROM test; Medix Biochemica, Kauniainen, Finland) in the vaginal fluid.	AF	Luminex xMAP technology	e first trimester ultrasound evaluation	IL-6	pg/mL	115															2018.5 *	17.0–6659.0	24	377.5 *	56.0–3259.0	18	0.003	* PPROM with MIAC vs WITHOUT MIAC
Kacerovsky	2012	Czech Republic	32-36.6 weeks	PPROM was defined as the leakage of amniotic fluid prior to the onset of labor (by at least 2 h). This condition was diagnosed visually using a sterile speculum examition to confirm pooling of amniotic fluid in the vagina together with a positive test for the presence of insulin-like growth factor-binding protein (ACTIM PROM test; Medix Biochemica, Kauniainen, Finland) in the vaginal fluid.	AF	Luminex xMAP technology	e first trimester ultrasound evaluation	IL-6	pg/mL	115															439.0	30.0-3756.0	24	270.5	28.0-3259.0	18	0.11	* PPROM with MIAC vs WITHOUT MIAC
Musilova	2017	Czech Republic	34-36.6 weeks	PPROM was diagnosed by examition with a sterile speculum to verify the pooling of amniotic fluid in the vagina. In situations of clinical doubt, amniotic fluid leakage was confirmed by the presence of insulin-like growth factor binding proteins (ACTIM PROM test; MedixBiochemica, Kauniainen, Finland) in the vaginal fluid.	UC	ELISA	first-trimester fetal biometry	IL-6	pg/mL	159															27.1 *	7.1–52.3	15	4.5*	2.3–7.5	107	0.003	*PPROM WITH BOTH MIAC AND IAI COMPARED TO PPROM WITHOUT BOTH MIAC AND IAI
Foulon, W	1995	Belgium	20-34 weeks	intact fetal membranes; regular uterine contractions of at least one in 10 minutes; and a cervical dilation less than 3 cm.	UC	ELISA	first-trimester fetal biometry	IL-6	pg/mL	44								>2292			NO
Musilova	2017	Czech Republic	24-36.6 weeks	PPROM was defined as the leakage of amniotic fluid prior to the onset of labor and was diagnosed visually by using a sterile speculum examition to confirm the pooling of amniotic fluid in the vagina. In case of clinical doubt, PPROM was confirmed by the presence of insulin-like growth factor–binding protein (ACTIM PROM test; Medix Biochemica, Kauniainen,Finland) in the vaginal fluid.	AF	a lateral flow immunoassay Milenia QuickLine IL-6	first trimester ultrasound scan	IL-6	pg/mL	287															NO			NO
Musilova	2017	Czech Republic	24-36.6 weeks	PPROM was defined as the leakage of amniotic fluid prior to the onset of labor and was diagnosed visually by using a sterile speculum examition to confirm the pooling of amniotic fluid in the vagina. In case of clinical doubt, PPROM was confirmed by the presence of insulin-like growth factor–binding protein (ACTIM PROM test; Medix Biochemica, Kauniainen,Finland) in the vaginal fluid.	AF	ELISA	first trimester ultrasound scan	IL-6	pg/mL	479															186*	50-673	62	183*	50-729	318	<0.0001	*PPROM with MIAC compared to without MIAC
Jacobsson	2003	SWEDEN	<34 weeks	Preterm labor was defined as regular uterine contractions (at least two uterine contractions/10 min during 30 min) in combition with cervical changes: (one, 2 cm in length and 1 cm in dilatation; two, 2 cm in length and cervical softening; three, 1 cm in dilatation and cervical softening; or four, cervical length <30 mm at endovaginal ultrasound).	AF	ELISA	routine ultrasound in the second trimester (16th to 19th weeks of gestation) and in two patients by the date of their last menstrual period.	IL-6	pg/mL	61								33200*	NA	10	720*	NA	51	0.01								*PTB with MIAC compared to without MIAC
Jacobsson	2003	SWEDEN	<34 weeks	NO INFORMATION	AF	ELISA	routine ultrasound in the second trimester (16th to 20th weeks of gestation)	IL-6	pg/mL	58															18600 **	NA	13	420**	NA	40		*mean calculated from individual values / **PPROM with MIAC compared to without MIAC
Yoon, B H	1998	KOREA	≤36 weeks	Rupture of membranes was diagnosed by sterile speculum examition confirming pooling, Nitrazine paper reaction, and ferning	AF	ELISA	NO INFORMATION	IL-6	pg/mL	120																						PPROM SAMPLES
Yoon, B H	1998	KOREA	≤36 weeks	Rupture of membranes was diagnosed by sterile speculum examition confirming pooling, Nitrazine paper reaction, and ferning	CB	NO INFORMATION	NO INFORMATION	IL-6	pg/mL	120																						PPROM SAMPLES
Kacerovsky	2014	Czech Republic	34-36.6 weeks	pPROM was diagnosed by examining with a sterile speculum to verify the pooling of amniotic fluid in the vagina after confirming the presence of insulin-like growth factor-binding protein (ACTIM PROM test; MedixBiochemica, Kauniainen, Finland) in the vaginal fluid.	NA	ELISA	NO INFORMATION	IL-6	pg/mL	99															784.1	NO	12	383.0*	39	NO	NA	*PPROM with MIAC
Jacobsson	2009	SWEDEN	22-34 weeks	We defined PTL as regular uterinecontractions (at least two uterine contractions/10 minutes for]30 minutes) in combition withone of the following cervical changes: (1)52cmLength at endovaginal ultrasound with ]1 cm dilata-tion, (2) 52 cm length with cervical softening, (3)]1 cm dilatation with cervical softening or cervicallengthB30 mm. pPROM was defined as visibleamniotic fluid with neutral pH i…	AF	ELISA	NO INFORMATION	IL-6	pg/mL	197																						* mean calculated from individual values
Veleminsky	2008	Czech Republic	second and third trimester	PROM after 37th week of gestation, pPROM before the end of the 37th week,females delivering after the 38th week, without PROM	UC	NO INFORMATION	NO INFORMATION	IL-6		152															>160			NO			0.024	*number os samples with pathologic levels of cytokines
ROMERO	2015	USA	20-35 weeks	Preterm prelabor rupture of membranes was diagnosed with a sterile speculum examition with documentation of pooling of amniotic fluid in the vagina in association with a positive nitrazine test and/or and positive ferning tests when necessary	AF	NO INFORMATION	Last menstrual period and confirmed by ultrasound examition, or by ultrasound examition alone if the sonographic determition of gestatiol age was not consistent with menstrual dating	IL-6	pg/mL	59															40.4*	13.2-151.5	17	0.7	0.5-1.1	18	<0.001
YOON	2003	KOREA	23-31 weeeks	PTD: <34 weeks of gestation	AF	ELISA	NO INFORMATION	IL-6	pg/mL	54								2100	100-25300	47	300	30-2400	7	<0.05								* > 34 weeks vc <34weeks
Kacerovsky	2015	Czech Republic	24+0 and 36+6 weeks	PPROM was defined as the leakage of the amniotic fluid prior to the onset of labor (by at least two hours). This condition was diagnosed visually using a sterile speculum examition to confirm the pooling of amniotic fluid in the vagina, together with a positive test for the presence of insulin-like growth factor-binding protein (ACTIM PROM test; Medix Biochemica, auniainen, Finland) in the vagina…	VF		first trimester ultrasound	IL-6	pg/mL	68															374	1–639	20	174	6–540	48	0.03	*PPROM with MIAC vs PPROM without MIAC
MARCONI	2011	BRAZIL	third trimester	PTL: less than 37 weeks of gestation, presence of regular uterine contractions each 10 min or less and cervical effacement equal or superior to 50% confirmed by two observers and ⁄ or cervical dilatation of at least 2 cm	AF	ELISA	ultrasound before 20 weeks	IL-8	pg/ml	40	114	33.7-261	20	39.1	16.8-61.3	20	<0.001
AMABEBE	2019	UK	19-36+6 weeks	PTL: regular uterine contractions (at least once every 10 mins) and cervical dilatation <3 cm, intact fetal membranes and no clinical evidence of genitouriry tract infection, abnormal cervical cytology or vaginal bleeding	CVF	multiplexed bead-based immunoassay	NO INFORMATION	IL-8	pg/mL	94	NO			NO				490.3	402.5-1827.8*	4	771.6	299.3-1385.3*	20	0.8								* (IQR: 25th; 75th percentile)
KASPER	2010	AUSTRIA	amniotomy during cesarean section < 37 WEEKS'S GESTATION	PROM) was that occurring before the onset of labor	AF	chemiluminescence immunoassay	NO INFORMATION	IL-8	pg/mL	118	NO			NO				UP ASSOCIATED WITH PTL+PPROM			NO				NO			NO
KASPER	2010	AUSTRIA	amniotomy during cesarean section < 37 WEEKS'S GESTATION	PROM) was that occurring before the onset of labor	AF	chemiluminescence immunoassay	NO INFORMATION	IL-8	pg/mL	118	NO			NO				UP ASSOCIATED WITH PTL+PPROM			NO				NO			NO
WOOD	2019	USA	second trimester	NO INFORMATION	VF	multiplex Luminex assay	last menstrual period and ultrasound Data	IL-8	pg/mL	119	NO			NO				NO			NO											EVALUATED MG AND MH TOGETHER
Kacerovsky	2013	Czech Republic	24.0-36.6 weeks	pPROM was defined as the leakage of amniotic fluid prior to the onset of labor (by at least 2 h). This condition was diagnosed visually using a sterile speculum examition to confirm pooling of amniotic fluid in the vagina and a positive test for the presence of insulin-like growth factor-binding protein (Actim PROM test; Medix Biochemica, Kauniainen,Finland) in the vaginal fluid	AF	Luminex xMAP technology	first-trimester ultrasound evaluation	IL-8	pg/mL	94															NO			NO
Figueroa	2005	USA	21-35 weeks	Preterm labor was defined as six to eight uterine contractions in one hour or four contractions in 20 minutes, associated with cervical dilatation or effacement	AF	ELISA	last menstrual period and first or second trimester obstetrical ultrasound evaluations	IL-8	pg/mL	43	4492*	100-113725	23	1043.5*	100-26424	20	<0.05	NO			NO
Witt	2005	AUSTRIA	23-34 weeks	patients with pPROM received intravenous ampicillin at a dose of 3=4 g or, in case of allergy, cefuroxim at a dose of 3=1.5 g for a maximum of 7 days. Following fetal indications, cesarean sections were performed after a median of 2 days of antibiotic treatment. Patients with PTL or other indications for preterm cesarean section did not receive antibiotics. Labor was not induced in any patient. I…	AF	chemiluminescence immunoassay	NO INFORMATION	IL-8	pg/mL	107																						*interquartile distance
Holst	2005	SWEDEN	22-33,6 weeks	PTL was defined as regular uterine contractions at a frequency of at least 2 uterine contractions/10 min for 30 min (confirmed by exterl tocometry) in combition with documented cervical ripening ( 2 cm length þ 1 cm dilatation or 2 cm length þ cervical softening or 1 cm dilatation þ cervical softening or cervical length <30 mm measured by vaginal ultrasound)	AF	ELISA	routine ultrasound in the second trimester (16th to 19th weeks of gestation)	IL-8	pg/mL	56	4670	NO	25	6660	NO	29	0.023	8.0008 *			150*											*PTB <34 weeks and delivery <7 days CONTROL 34 weeks and delivery > 7 days
Holst	2005	SWEDEN	22-33,6 weeks	PTL was defined as regular uterine contractions at a frequency of at least 2 uterine contractions/10 min for 30 min (confirmed by exterl tocometry) in combition with documented cervical ripening ( 2 cm length þ 1 cm dilatation or 2 cm length þ cervical softening or 1 cm dilatation þ cervical softening or cervical length <30 mm measured by vaginal ultrasound)	CF	ELISA	routine ultrasound in the second trimester (16th to 19th weeks of gestation)	IL-8	pg/mL	89	18900	5200-75300		5900	3400-98100		0.03															*PTB <34 weeks and delivery <7 days CONTROL 34 weeks and delivery > 7 days
Foulon, W	1995	Belgium	20-34 weeks	intact fetal membranes; regular uterine contractions of at least one in 10 minutes; and a cervical dilation less than 3 cm.	UC	ELISA	first-trimester fetal biometry	IL-8	pg/mL	44								>163.6			NO
Jacobsson	2003	SWEDEN	<34 weeks	Preterm labor was defined as regular uterine contractions (at least two uterine contractions/10 min during 30 min) in combition with cervical changes: (one, 2 cm in length and 1 cm in dilatation; two, 2 cm in length and cervical softening; three, 1 cm in dilatation and cervical softening; or four, cervical length <30 mm at endovaginal ultrasound).	AF	ELISA	routine ultrasound in the second trimester (16th to 19th weeks of gestation) and in two patients by the date of their last menstrual period.	IL-8	pg/mL	61								26390*	NA	10	370*	NA	51	0.002								*PTB with MIAC compared to without MIAC
Jacobsson	2003	SWEDEN	<34 weeks	NO INFORMATION	AF	ELISA	routine ultrasound in the second trimester (16th to 20th weeks of gestation)	IL-8	pg/mL	58															466	NA	13	25	NA	40		*mean calculated from individual values / **PPROM with MIAC compared to without MIAC
Veleminsky	2008	Czech Republic	second and third trimester	PROM after 37th week of gestation, pPROM before the end of the 37th week,females delivering after the 38th week, without PROM	UC	NO INFORMATION	NO INFORMATION	IL-8		152															>70			NO			0.024	*number os samples with pathologic levels of cytokines
Yoneda	2018	JAPAN	20-29 weeks	Preterm labor was defined by the presence of regular uterine contractions (6 hour or more), cervical changes of more than 50% effaced, and dilatation of the cervix or shortening of the cervical length to less than 25 mm before 37 completed weeks of gestation	AF	ELISA	last menstrual period or ultrasound findings of the crown-rump length (CRL) size between 8 and 10 weeks	IL-8	pg/mL	105	15200*	200-381500	19	5800	100-413700	86	0.005															*AF “sludge” group vs no “sludge” group
Kacerovsky	2015	Czech Republic	24+0 and 36+6 weeks	PPROM was defined as the leakage of the amniotic fluid prior to the onset of labor (by at least two hours). This condition was diagnosed visually using a sterile speculum examition to confirm the pooling of amniotic fluid in the vagina, together with a positive test for the presence of insulin-like growth factor-binding protein (ACTIM PROM test; Medix Biochemica, auniainen, Finland) in the vagina…	VF		first trimester ultrasound	IL-8	pg/mL	68															1643	93–8444	20	770	110–7442	48	0.02	*PPROM with MIAC vs PPROM without MIAC
Kacerovsky	2009	Czech Republic	24-36 weeks	PPROM: vaginal pooling of amniotic fluid and the nitrazine test or the presence of the insulin-like growth factor binding protein – 1 (Actim PROM test, Medix Biochemica OY AB, Kauniainen, Finland) in the vaginal fluid.	AF	ELISA	last menstrual period and confirmed by ultrasound measurement of a crown-rump length (CRL) during the first trimester	IL-8	pg/mL	29															1888	519–5577	10	1225	60–2766	19	0.017	*PPROM with MIAC
Pacora	2000	KOREA	mid and thrid-trimester	Preterm labor was determined by the presence of regular uterine contractions occurring at a minimum frequency of 2 contractions/10 min combined with documented cervical changes at <37 weeks’ gestation. Premature rupture of membranes was determined by amniorrhexis before the onset of spontaneous labor.	AF	ELISA	NO INFORMATION	Lactoferrin	ng/mL	268	4563.1*	746.0-47,020.0	23	3947.9	1.24-26,060.0	10	0.9															*intra-amniotic infection with UU x with other microorganisms
Kacerovsky	2013	Czech Republic	24.0-36.6 weeks	pPROM was defined as the leakage of amniotic fluid prior to the onset of labor (by at least 2 h). This condition was diagnosed visually using a sterile speculum examition to confirm pooling of amniotic fluid in the vagina and a positive test for the presence of insulin-like growth factor-binding protein (Actim PROM test; Medix Biochemica, Kauniainen,Finland) in the vaginal fluid	AF	Luminex xMAP technology	first-trimester ultrasound evaluation	Leptin	pg/mL	94															NO			NO
Kacerovsky	2012	Czech Republic	24-31.6 weeks	PPROM was defined as the leakage of amniotic fluid prior to the onset of labor (by at least 2 h). This condition was diagnosed visually using a sterile speculum examition to confirm pooling of amniotic fluid in the vagina together with a positive test for the presence of insulin-like growth factor-binding protein (ACTIM PROM test; Medix Biochemica, Kauniainen, Finland) in the vaginal fluid.	AF	Luminex xMAP technology	e first trimester ultrasound evaluation	Leptin	pg/mL	115															1292.5	126.0-6226.0	24	1698.5	102.0-6345.0	18	0.29	* PPROM with MIAC vs WITHOUT MIAC
Kacerovsky	2012	Czech Republic	32-36.6 weeks	PPROM was defined as the leakage of amniotic fluid prior to the onset of labor (by at least 2 h). This condition was diagnosed visually using a sterile speculum examition to confirm pooling of amniotic fluid in the vagina together with a positive test for the presence of insulin-like growth factor-binding protein (ACTIM PROM test; Medix Biochemica, Kauniainen, Finland) in the vaginal fluid.	AF	Luminex xMAP technology	e first trimester ultrasound evaluation	Leptin	pg/mL	115															433.0	42.0-7672.0	24	805.5	64.0-4219.0	18	0.23	* PPROM with MIAC vs WITHOUT MIAC
Kacerovsky	2013	Czech Republic	24.0-36.6 weeks	pPROM was defined as the leakage of amniotic fluid prior to the onset of labor (by at least 2 h). This condition was diagnosed visually using a sterile speculum examition to confirm pooling of amniotic fluid in the vagina and a positive test for the presence of insulin-like growth factor-binding protein (Actim PROM test; Medix Biochemica, Kauniainen,Finland) in the vaginal fluid	AF	Luminex xMAP technology	first-trimester ultrasound evaluation	MCP-1	pg/mL	94															NO			NO
Payne	2014	AUSTRALIA	15-20 weeks	NO INFORMATION	AF	multiplex - MilliPlex MAGPIX	ultrasound imaging and biometryin the first or early second trimester	MCP-1	pg/mL	972
Kacerovsky	2013	Czech Republic	24.0-36.6 weeks	pPROM was defined as the leakage of amniotic fluid prior to the onset of labor (by at least 2 h). This condition was diagnosed visually using a sterile speculum examition to confirm pooling of amniotic fluid in the vagina and a positive test for the presence of insulin-like growth factor-binding protein (Actim PROM test; Medix Biochemica, Kauniainen,Finland) in the vaginal fluid	AF	Luminex xMAP technology	first-trimester ultrasound evaluation	MIF	pg/mL	94															NO			NO
Kacerovsky	2012	Czech Republic	24-31.6 weeks	PPROM was defined as the leakage of amniotic fluid prior to the onset of labor (by at least 2 h). This condition was diagnosed visually using a sterile speculum examition to confirm pooling of amniotic fluid in the vagina together with a positive test for the presence of insulin-like growth factor-binding protein (ACTIM PROM test; Medix Biochemica, Kauniainen, Finland) in the vaginal fluid.	AF	Luminex xMAP technology	e first trimester ultrasound evaluation	MIF	pg/mL	115															8600	1400-50000	24	9300	2800-50000	18	0.95	* PPROM with MIAC vs WITHOUT MIAC
Kacerovsky	2012	Czech Republic	32-36.6 weeks	PPROM was defined as the leakage of amniotic fluid prior to the onset of labor (by at least 2 h). This condition was diagnosed visually using a sterile speculum examition to confirm pooling of amniotic fluid in the vagina together with a positive test for the presence of insulin-like growth factor-binding protein (ACTIM PROM test; Medix Biochemica, Kauniainen, Finland) in the vaginal fluid.	AF	Luminex xMAP technology	e first trimester ultrasound evaluation	MIF	pg/mL	115															5200.0	1600-23200	24	4400	1300-30900	18	0.70	* PPROM with MIAC vs WITHOUT MIAC
Kacerovsky	2013	Czech Republic	24.0-36.6 weeks	pPROM was defined as the leakage of amniotic fluid prior to the onset of labor (by at least 2 h). This condition was diagnosed visually using a sterile speculum examition to confirm pooling of amniotic fluid in the vagina and a positive test for the presence of insulin-like growth factor-binding protein (Actim PROM test; Medix Biochemica, Kauniainen,Finland) in the vaginal fluid	AF	Luminex xMAP technology	first-trimester ultrasound evaluation	MIP-1α	pg/mL	94															NO			NO
YOON	2001	KOREA	mid-trimester genetic amniocentesis	spontaneous preterm delivery (<32 weeks)	AF	ELISA	NO INFORMATION	MMP-8	pg/mL	114								3000.1	300-1954900	19	1000.3	<300-45200	95	<0.01
OH	2010	KOREA	16-29 weeks	NO INFORMATION	AF	ELISA; HEMOCYTOMETER	NO INFORMATION	MMP-8	pg/Ml (PCR+)	58								NO			NO											* RELATION OF MMP-8 AND MH, UP and UU NOT DESCRIBED SEPARATELY;
OH	2010	KOREA	16-29 weeks	NO INFORMATION	AF	ELISA; HEMOCYTOMETER	NO INFORMATION	MMP-8	pg/mL (culture+)	58								NO			NO											* RELATION OF MMP-8 AND MH, UP and UU NOT DESCRIBED SEPARATELY;
WOOD	2019	USA	second trimester	NO INFORMATION	VF	multiplex Luminex assay	last menstrual period and ultrasound Data	MMP-8	pg/mL	119	NO			NO				NO			NO											EVALUATED MG AND MH TOGETHER
Park	2013	KOREA	<34 weeks	NO INFORMATION	AF	ELISA	NO INFORMATION	MMP-8	pg/mL	81	675000.0 *	26000-6142600	34	NO				NO			NO				416800 *	400-5019500	47	NO				*PTL was associated with a higher median concentration at birth than preterm-PROM, in the context of acute-HCA with funisitis
OH	2019	KOREA	< 37 weeks	NO INFORMATION	AF	ELISA	NO INFORMATION	MMP-8	pg/mL	71															714600	165800-2681200	17	24900	1800-272300	15	<0.05	* extreme PPROM (<26w, vs late PPROM(34-36.9w)
WOOD	2019	USA	second trimester	NO INFORMATION	VF	multiplex Luminex assay	last menstrual period and ultrasound Data	MMP-9	pg/mL	119	NO			NO				NO			NO											EVALUATED MG AND MH TOGETHER
Kacerovsky	2013	Czech Republic	24.0-36.6 weeks	pPROM was defined as the leakage of amniotic fluid prior to the onset of labor (by at least 2 h). This condition was diagnosed visually using a sterile speculum examition to confirm pooling of amniotic fluid in the vagina and a positive test for the presence of insulin-like growth factor-binding protein (Actim PROM test; Medix Biochemica, Kauniainen,Finland) in the vaginal fluid	AF	Luminex xMAP technology	first-trimester ultrasound evaluation	MMP-9	pg/mL	94															NO			NO
Kacerovsky	2012	Czech Republic	24-31.6 weeks	PPROM was defined as the leakage of amniotic fluid prior to the onset of labor (by at least 2 h). This condition was diagnosed visually using a sterile speculum examition to confirm pooling of amniotic fluid in the vagina together with a positive test for the presence of insulin-like growth factor-binding protein (ACTIM PROM test; Medix Biochemica, Kauniainen, Finland) in the vaginal fluid.	AF	Luminex xMAP technology	e first trimester ultrasound evaluation	MMP-9	pg/mL	115															5292.5	571.0-87534.0	24	3803.5	1074.0-7654.0	18	0.20	* PPROM with MIAC vs WITHOUT MIAC
Kacerovsky	2012	Czech Republic	32-36.6 weeks	PPROM was defined as the leakage of amniotic fluid prior to the onset of labor (by at least 2 h). This condition was diagnosed visually using a sterile speculum examition to confirm pooling of amniotic fluid in the vagina together with a positive test for the presence of insulin-like growth factor-binding protein (ACTIM PROM test; Medix Biochemica, Kauniainen, Finland) in the vaginal fluid.	AF	Luminex xMAP technology	e first trimester ultrasound evaluation	MMP-9	pg/mL	115															2443.0	461.0-24553.0	24	1922.0	529.0-16325.0	18	0.24	* PPROM with MIAC vs WITHOUT MIAC
WOOD	2019	USA	second trimester	NO INFORMATION	VF	multiplex Luminex assay	last menstrual period and ultrasound Data	NGAL	pg/mL	119	NO			NO				NO			NO											EVALUATED MG AND MH TOGETHER
Kacerovsky	2013	Czech Republic	24.0-36.6 weeks	pPROM was defined as the leakage of amniotic fluid prior to the onset of labor (by at least 2 h). This condition was diagnosed visually using a sterile speculum examition to confirm pooling of amniotic fluid in the vagina and a positive test for the presence of insulin-like growth factor-binding protein (Actim PROM test; Medix Biochemica, Kauniainen,Finland) in the vaginal fluid	AF	Luminex xMAP technology	first-trimester ultrasound evaluation	NT-3	pg/mL	94															NO			NO
Kacerovsky	2012	Czech Republic	24-31.6 weeks	PPROM was defined as the leakage of amniotic fluid prior to the onset of labor (by at least 2 h). This condition was diagnosed visually using a sterile speculum examition to confirm pooling of amniotic fluid in the vagina together with a positive test for the presence of insulin-like growth factor-binding protein (ACTIM PROM test; Medix Biochemica, Kauniainen, Finland) in the vaginal fluid.	AF	Luminex xMAP technology	e first trimester ultrasound evaluation	NT-3	pg/mL	115															536.0	235.0-2368.0	24	506.5	148.0-1259.0	18	0.40	* PPROM with MIAC vs WITHOUT MIAC
Kacerovsky	2012	Czech Republic	32-36.6 weeks	PPROM was defined as the leakage of amniotic fluid prior to the onset of labor (by at least 2 h). This condition was diagnosed visually using a sterile speculum examition to confirm pooling of amniotic fluid in the vagina together with a positive test for the presence of insulin-like growth factor-binding protein (ACTIM PROM test; Medix Biochemica, Kauniainen, Finland) in the vaginal fluid.	AF	Luminex xMAP technology	e first trimester ultrasound evaluation	NT-3	pg/mL	115															368.0	180.0-890.0	24	362.0	120.0-697.0	18	0.80	* PPROM with MIAC vs WITHOUT MIAC
Kacerovsky	2014	Czech Republic	24.0-36.6 weeks	pPROM was defined as the leakage of amniotic fluid prior to the onset of labor (by at least 2 h). This condition was diagnosed visually using a sterile speculum examition to confirm pooling of amniotic fluid in the vagina and a positive test for the presence of insulin-like growth factor-binding protein (Actim PROM test; Medix Biochemica, Kauniainen,Finland) in the vaginal fluid	AF	ELISA	first-trimester ultrasound evaluation	Nucleosome		80															NO			NO
Cherouny	1993	USA	≤34 weeks	Preterm labor was defined as four or more uterine contractions over 20 minutes associated with cervical change or 2 em of cervical dilation, or 80% cervical effacement associated with contractions.	AF	ELISA	ultrasonography or neotal assessment at University Hospital in all cases	P-I/IL-8	pg/mL	58																						*PTL samples
AMABEBE	2019	UK	19-36+6 weeks	PTL: regular uterine contractions (at least once every 10 mins) and cervical dilatation <3 cm, intact fetal membranes and no clinical evidence of genitouriry tract infection, abnormal cervical cytology or vaginal bleeding	CVF	multiplexed bead-based immunoassay	NO INFORMATION	RANTES	pg/mL	94	NO			NO				101.4	70.7-541.3*	6	40.8	12.8-67.3*	9	0.02								* (IQR: 25th; 75th percentile)
Espinoza	2002	USA	mid and thrid-trimester	Preterm labor was defined as the presence of regular uterine contractions with a frequency of at least two every 10 min and/or changes in the cervical Bishop’s score occurring before 37 weeks. Ritodrine or magnesium sulfate was administered intravenously according to protocols described elsewhere	AF	ELISA		sCD14	pg/mL	44	1568000*	98000-5887000	18	645000*	0-3961000	26	0.01															*PTL WITH MIAC/IAI COMPARED WITH PTL WITHOUT MIAC/IAI
Kacerovsky	2013	Czech Republic	24.0-36.6 weeks	pPROM was defined as the leakage of amniotic fluid prior to the onset of labor (by at least 2 h). This condition was diagnosed visually using a sterile speculum examition to confirm pooling of amniotic fluid in the vagina and a positive test for the presence of insulin-like growth factor-binding protein (Actim PROM test; Medix Biochemica, Kauniainen,Finland) in the vaginal fluid	AF	Luminex xMAP technology	first-trimester ultrasound evaluation	sIL-6rα	pg/mL	94															NO			NO
Kacerovsky	2012	Czech Republic	24-31.6 weeks	PPROM was defined as the leakage of amniotic fluid prior to the onset of labor (by at least 2 h). This condition was diagnosed visually using a sterile speculum examition to confirm pooling of amniotic fluid in the vagina together with a positive test for the presence of insulin-like growth factor-binding protein (ACTIM PROM test; Medix Biochemica, Kauniainen, Finland) in the vaginal fluid.	AF	Luminex xMAP technology	e first trimester ultrasound evaluation	sIL-6rα	pg/mL	115															754.0	86.0-2970.0	24	439.0	69.0-1461.0	18	0.22	* PPROM with MIAC vs WITHOUT MIAC
Kacerovsky	2012	Czech Republic	32-36.6 weeks	PPROM was defined as the leakage of amniotic fluid prior to the onset of labor (by at least 2 h). This condition was diagnosed visually using a sterile speculum examition to confirm pooling of amniotic fluid in the vagina together with a positive test for the presence of insulin-like growth factor-binding protein (ACTIM PROM test; Medix Biochemica, Kauniainen, Finland) in the vaginal fluid.	AF	Luminex xMAP technology	e first trimester ultrasound evaluation	sIL-6rα	pg/mL	115															185.0	65.0-1622.0	24	196.0	38.0-1843.0	18	0.81	* PPROM with MIAC vs WITHOUT MIAC
WOOD	2019	USA	second trimester	NO INFORMATION	VF	multiplex Luminex assay	last menstrual period and ultrasound Data	SLPI	pg/mL	119	NO			NO				NO			NO											EVALUATED MG AND MH TOGETHER
Kacerovsky	2013	Czech Republic	24.0-36.6 weeks	pPROM was defined as the leakage of amniotic fluid prior to the onset of labor (by at least 2 h). This condition was diagnosed visually using a sterile speculum examition to confirm pooling of amniotic fluid in the vagina and a positive test for the presence of insulin-like growth factor-binding protein (Actim PROM test; Medix Biochemica, Kauniainen,Finland) in the vaginal fluid	AF	Luminex xMAP technology	first-trimester ultrasound evaluation	STNF-R1	pg/mL	94															NO			NO
Kacerovsky	2012	Czech Republic	24-31.6 weeks	PPROM was defined as the leakage of amniotic fluid prior to the onset of labor (by at least 2 h). This condition was diagnosed visually using a sterile speculum examition to confirm pooling of amniotic fluid in the vagina together with a positive test for the presence of insulin-like growth factor-binding protein (ACTIM PROM test; Medix Biochemica, Kauniainen, Finland) in the vaginal fluid.	AF	Luminex xMAP technology	e first trimester ultrasound evaluation	sTNF-R1	pg/mL	115															1465.5	174.0-7517.0	24	1003.0	324.0-3943.0	18	0.66	* PPROM with MIAC vs WITHOUT MIAC
Kacerovsky	2012	Czech Republic	32-36.6 weeks	PPROM was defined as the leakage of amniotic fluid prior to the onset of labor (by at least 2 h). This condition was diagnosed visually using a sterile speculum examition to confirm pooling of amniotic fluid in the vagina together with a positive test for the presence of insulin-like growth factor-binding protein (ACTIM PROM test; Medix Biochemica, Kauniainen, Finland) in the vaginal fluid.	AF	Luminex xMAP technology	e first trimester ultrasound evaluation	sTNF-R1	pg/mL	115															294.0	158.0-2838.0	24	338.0	135.0-3117.0	18	0.96	* PPROM with MIAC vs WITHOUT MIAC
MARCONI	2011	BRAZIL	third trimester	PTL: less than 37 weeks of gestation, presence of regular uterine contractions each 10 min or less and cervical effacement equal or superior to 50% confirmed by two observers and ⁄ or cervical dilatation of at least 2 cm	AF	ELISA	ultrasound before 20 weeks	TNF-α	pg/ml	40	10.5	7.9-13.1	20	<7.9		20	NS
PERNI	2004	USA	15-19 weeks	PPROM was defined as the rupture of the chorioamniotic membrane before the onset of labor at 37 weeks of gestation. Spontaneous preterm birth was defined as birth at !37 weeks of gestation preceded by preterm labor with intact membranes.	AF	ELISA	NO INFORMATION	TNF-α	pg/mL	179	NO			NO				NO			NO				NO			NO
WOOD	2019	USA	second trimester	NO INFORMATION	VF	multiplex Luminex assay	last menstrual period and ultrasound Data	TNF-α	pg/mL	119	NO			NO				NO			NO											EVALUATED MG AND MH TOGETHER
Thomakos	2009	GREECE	mid-trimester genetic amniocentesis	Pregncy outcomes were obtained by assessing labour and delivery records or by contacting the patient’s private physician if the delivery was not in our hospital	AF	ELISA	last menstrual period or by an early ultrasound scan if there was a discrepancy of more than a week	TNF-α	pg/mL	144	NO			NO				8.8	7.2-10.7	48	5.5	5.0-6.3	96	<0.001								interquartile range
Figueroa	2005	USA	21-35 weeks	Preterm labor was defined as six to eight uterine contractions in one hour or four contractions in 20 minutes, associated with cervical dilatation or effacement	AF	ELISA	last menstrual period and first or second trimester obstetrical ultrasound evaluations	TNF-α	pg/mL	43	74*	14-900	23	82.5*	11-300	20	NS	NO			NO											*Women with preterm labor and intact membranes that delivered within 7 days had higher AF concentrations of pro-inflammatory cytokines than those who delivered after 7 days of the amniocentesis regardless of the AF culture results
Foulon, W	1995	Belgium	20-34 weeks	intact fetal membranes; regular uterine contractions of at least one in 10 minutes; and a cervical dilation less than 3 cm.	UC	ELISA	first-trimester fetal biometry	TNF-α	pg/mL	44								>23.1			NO
Yoon, B H	1998	KOREA	≤36 weeks	Rupture of membranes was diagnosed by sterile speculum examition confirming pooling, Nitrazine paper reaction, and ferning	AF	ELISA	NO INFORMATION	TNF-α	pg/mL	120																						PPROM SAMPLES
Jacobsson	2009	SWEDEN	22-34 weeks	We defined PTL as regular uterinecontractions (at least two uterine contractions/10 minutes for]30 minutes) in combition withone of the following cervical changes: (1)52cmLength at endovaginal ultrasound with ]1 cm dilata-tion, (2) 52 cm length with cervical softening, (3)]1 cm dilatation with cervical softening or cervicallengthB30 mm. pPROM was defined as visibleamniotic fluid with neutral pH i…	AF	ELISA	NO INFORMATION	TNF-α	pg/mL	197																						* mean calculated from individual values
Veleminsky	2008	Czech Republic	second and third trimester	PROM after 37th week of gestation, pPROM before the end of the 37th week,females delivering after the 38th week, without PROM	UC	NO INFORMATION	NO INFORMATION	TNF-α		152															>20			NO			0.024	*number os samples with pathologic levels of cytokines
Payne	2014	AUSTRALIA	15-20 weeks	NO INFORMATION	AF	multiplex - MilliPlex MAGPIX	ultrasound imaging and biometryin the first or early second trimester	TNF-α	pg/mL	972
ROMERO	1992	USA	first and third trimester	PPROM: amniorrhexis before the onset of spontaneous labor. Nitrazin e, pooling, and ferning tests; PTL: regular uterine contractions with a frequency of at least two every 10 minutes and with changes in the cervical Bishop's score occurring before 37 completed weeks	AF	ELISA and Immunoblot	NO INFORMATION	TNF-α	pg/mL	52								820	<60-2340	13	NO	<25-100	16	<0.01	249*	<60-1980	13	NO	NO	15	<0.01	*PPROM with MIAC
AMABEBE	2019	UK	19-36+6 weeks	PTL: regular uterine contractions (at least once every 10 mins) and cervical dilatation <3 cm, intact fetal membranes and no clinical evidence of genitouriry tract infection, abnormal cervical cytology or vaginal bleeding	CVF	multiplexed bead-based immunoassay	NO INFORMATION	TNFr1	pg/mL	94	NO			NO				2350.7	645.7-3795.8*	19	781.4	283.3-1814.5*	75	0.006								* (IQR: 25th; 75th percentile)
Kacerovsky	2013	Czech Republic	24.0-36.6 weeks	pPROM was defined as the leakage of amniotic fluid prior to the onset of labor (by at least 2 h). This condition was diagnosed visually using a sterile speculum examition to confirm pooling of amniotic fluid in the vagina and a positive test for the presence of insulin-like growth factor-binding protein (Actim PROM test; Medix Biochemica, Kauniainen,Finland) in the vaginal fluid	AF	Luminex xMAP technology	first-trimester ultrasound evaluation	TREM-1	pg/mL	94															NO			NO
Kacerovsky	2012	Czech Republic	24-31.6 weeks	PPROM was defined as the leakage of amniotic fluid prior to the onset of labor (by at least 2 h). This condition was diagnosed visually using a sterile speculum examition to confirm pooling of amniotic fluid in the vagina together with a positive test for the presence of insulin-like growth factor-binding protein (ACTIM PROM test; Medix Biochemica, Kauniainen, Finland) in the vaginal fluid.	AF	Luminex xMAP technology	e first trimester ultrasound evaluation	TREM-1	pg/mL	115															210.5	60.0-2790.0	24	209.0	60.0-598.0	18	0.27	* PPROM with MIAC vs WITHOUT MIAC
Kacerovsky	2012	Czech Republic	24-31.6 weeks	PPROM was defined as the leakage of amniotic fluid prior to the onset of labor (by at least 2 h). This condition was diagnosed visually using a sterile speculum examition to confirm pooling of amniotic fluid in the vagina together with a positive test for the presence of insulin-like growth factor-binding protein (ACTIM PROM test; Medix Biochemica, Kauniainen, Finland) in the vaginal fluid.	AF	Luminex xMAP technology	e first trimester ultrasound evaluation	TREM-1	pg/mL	115															85000	22400-357200	24	69300	25000-376600	18	0.29	* PPROM with MIAC vs WITHOUT MIAC
Kacerovsky	2012	Czech Republic	32-36.6 weeks	PPROM was defined as the leakage of amniotic fluid prior to the onset of labor (by at least 2 h). This condition was diagnosed visually using a sterile speculum examition to confirm pooling of amniotic fluid in the vagina together with a positive test for the presence of insulin-like growth factor-binding protein (ACTIM PROM test; Medix Biochemica, Kauniainen, Finland) in the vaginal fluid.	AF	Luminex xMAP technology	e first trimester ultrasound evaluation	TREM-1	pg/mL	115															159.0	43.0-673.0	24	134.0	58.0-579.0	18	0.23	* PPROM with MIAC vs WITHOUT MIAC
Kacerovsky	2012	Czech Republic	32-36.6 weeks	PPROM was defined as the leakage of amniotic fluid prior to the onset of labor (by at least 2 h). This condition was diagnosed visually using a sterile speculum examition to confirm pooling of amniotic fluid in the vagina together with a positive test for the presence of insulin-like growth factor-binding protein (ACTIM PROM test; Medix Biochemica, Kauniainen, Finland) in the vaginal fluid.	AF	Luminex xMAP technology	e first trimester ultrasound evaluation	TREM-1	pg/mL	115															31100	14600-180400	24	36200	12000-37700	18	0.68	* PPROM with MIAC vs WITHOUT MIAC
OH	2010	KOREA	16-29 weeks	NO INFORMATION	AF	ELISA; HEMOCYTOMETER	NO INFORMATION	WBC	cells/mm3 (PCR+)	58								NO			NO											* RELATION OF MMP-8 AND MH, UP and UU NOT DESCRIBED SEPARATELY;
OH	2010	KOREA	16-29 weeks	NO INFORMATION	AF	ELISA; HEMOCYTOMETER	NO INFORMATION	WBC	cells/mm3 (culture+)	58								NO			NO											* RELATION OF MMP-8 AND MH, UP and UU NOT DESCRIBED SEPARATELY;
LEE	2013	KOREA	20-34 weeks	Preterm labor was defined as the presence of regular uterine contractions with a frequency of at least two every 10 min and cervical change before 37 completed weeks of gestation that required ; Rupture of membranes was diagnosed by a sterile speculum examition confirming pooling of AF in the vagina and a positive nitrazine test. hospitalization	AF	Turbidimetric immunoassay	NO INFORMATION	WBC	cells/mm3	237	NO			NO				NO			NO				1330	1499	10	179	1159	227	<0.001	control is without rupture of membranes after 48h amniocentesis
Kim	2003	KOREA	<37 weeks	Preterm labor was defined as the presence of regular uterine contractions with a frequency of at least two every 10 minutes and cervical change. Rupture of membranes was diagnosed by sterile speculum examition confirming pooling of amniotic fluid in the vagina, a positive Nitrazine paper test result, and a positive ferning test result	AF	hemocytometer chamber	NO INFORMATION	WBC	cells/mm3	77	NO			NO				NO			NO				NO			NO				*UU BIOVAR PARVO COMPARED TO T960
Witt	2005	AUSTRIA	23-34 weeks	patients with pPROM received intravenous ampicillin at a dose of 3=4 g or, in case of allergy, cefuroxim at a dose of 3=1.5 g for a maximum of 7 days. Following fetal indications, cesarean sections were performed after a median of 2 days of antibiotic treatment. Patients with PTL or other indications for preterm cesarean section did not receive antibiotics. Labor was not induced in any patient. I…	MS	NO INFORMATION	NO INFORMATION	WBC	cells/mm3	200
Stepan	2016	Czech Republic	24-36.6 weeks	PPROM was defined as the leakage of amniotic fluid prior to the onset of labor and was diagnosed visually by using a sterile speculum examition to confirm the pooling of amniotic fluid in the vagina. In case of clinical doubt, PPROM was confirmed by the presence of insulin-like growth factor–binding protein (ACTIM PROM test; Medix Biochemica, Kauniainen,Finland) in the vaginal fluid.	MS	high-sensitivity immunoturbidimetric alysis	first trimester ultrasound scan	WBC	x10 9/L	386															11.7*	0.1–14.8	32	12 *	10.0–14.6	116	0.46	*PPROM with MIAC compared to without MIAC
Musilova	2017	Czech Republic	24-36.6 weeks	PPROM was defined as the leakage of amniotic fluid prior to the onset of labor and was diagnosed visually by using a sterile speculum examition to confirm the pooling of amniotic fluid in the vagina. In case of clinical doubt, PPROM was confirmed by the presence of insulin-like growth factor–binding protein (ACTIM PROM test; Medix Biochemica, Kauniainen,Finland) in the vaginal fluid.	MS	BC count immediately following sampling	first trimester ultrasound scan	WBC	x10 9/L	479															12.8*	10.8-15.8	130	11.9*	9.8-14.4	349	0.0006;	*PPROM with MIAC compared to without MIAC
Yoon, B H	1998	KOREA	≤36 weeks	Rupture of membranes was diagnosed by sterile speculum examition confirming pooling, Nitrazine paper reaction, and ferning	AF	NO INFORMATION	NO INFORMATION	WBC	cells/mm3	120																						PPROM SAMPLES
Kacerovsky	2014	Czech Republic	24-36.6 weeks	pPROM was diagnosed by examining with a sterile speculum to verify the pooling of amniotic fluid in the vagina after confirming the presence of insulin-like growth factor-binding protein (ACTIM PROM test; MedixBiochemica, Kauniainen, Finland) in the vaginal fluid.	UC	ELISA	first trimester fetal biometry	WBC	cells x 10 9 L	158
Yoneda	2018	JAPAN	20-29 weeks	Preterm labor was defined by the presence of regular uterine contractions (6 hour or more), cervical changes of more than 50% effaced, and dilatation of the cervix or shortening of the cervical length to less than 25 mm before 37 completed weeks of gestation	AF	NO INFORMATION	last menstrual period or ultrasound findings of the crown-rump length (CRL) size between 8 and 10 weeks	WBC	cells/mm3	105	14,25*	500-20,000	19	8	0-540,000	86	0.298
ROMERO	2015	USA	20-35 weeks	Preterm prelabor rupture of membranes was diagnosed with a sterile speculum examition with documentation of pooling of amniotic fluid in the vagina in association with a positive nitrazine test and/or and positive ferning tests when necessary	AF	NO INFORMATION	Last menstrual period and confirmed by ultrasound examition, or by ultrasound examition alone if the sonographic determition of gestatiol age was not consistent with menstrual dating	WBC	cells/mm3	59															58.0*	15.5-442	17	1.0	0-4.0	18	<0.001
WATTS	1992	USA	24-34 weeks	Regular contractions occurring at least every 10 minutes or six times per hour, together with either cervical change or a Bishop score of at 4 that included cervical dilatation of at 1 cm or cervical effacement of at least 50% on the initial examition, between 23-34 weeks	AF	cell counting	ultrasound examition	WBC	cells/mm3	105
OH	2019	KOREA	< 37 weeks	NO INFORMATION	AF	hemocytometer chamber	NO INFORMATION	WBC	cells/mm3	73															>1000	384 – >1000	17	101	(3 – >1000	15	0.10	* extreme PPROM (<26w, vs late PPROM(34-36.9w)
OH	2019	KOREA	< 37 weeks	NO INFORMATION	MB	hemocytometer chamber	NO INFORMATION	WBC	cells/mm3	73															13.73	9845–17,890	17	12.335	8363–15,200	15	0.186	* extreme PPROM (<26w, vs late PPROM(34-36.9w)
YOON	2002	KOREA	23-31 weeeks	PTD: <34 weeks of gestation	AF	hemocytometer chamber	NO INFORMATION	WBC	cells/mm3	54								3	0->1000	47	1	0-700	7	<0.05								* > 34 weeks vc <34weeks
