# Supplementary material for: Genital Mycoplasmas and Biomarkers of Inflammation and Their Association With Spontaneous Preterm Birth and Preterm Prelabor Rupture of Membranes: A Systematic Review and Meta-Analysis
Source: Front Microbiol. 2022 Mar 30;13:859732. doi: 10.3389/fmicb.2022.859732 (PMC9006060; doi:10.3389/fmicb.2022.859732)
Supplement: Supplementary file 9 [file Table_8.xlsx]

## Sheet: Supp Table 8
First author	Year	Country	Time of screening	Specimen Used	Method of Detection	Gestatiol age measurement	Type of biomarker	Unit	Sample Size	M. genitalium						M. hominis								U. parvum							U. urealyticum							Ureaplasma spp. or Mycoplasma spp.
										Positive MEDIAN	Positive RANGE	Positive n	Negative MEDIAN or MEAN	Negative RANGE or SD	Negative n	p value	Positive MEDIAN or MEAN	Positive RANGE or SD	Positive n	Negative MEDIAN or MEAN	Negative RANGE or SD	Negative n	p value	Positive MEDIAN or MEAN	Positive RANGE or SD	Positive n	Negative MEDIAN or MEAN	Negative RANGE or SD	Negative n	p value	Positive MEDIAN or MEAN	Positive RANGE or SD	Positive n	Negative MEDIAN or MEAN	Negative RANGE or SD	Negative n	p value	Positive MEDIAN or MEAN	Positive RANGE or SD	Positive n	Negative MEDIAN or MEAN	Negative RANGE or SD	Negative n	p value
Kacerovsky	2013	Czech Republic	24.0-36.6 weeks	amniotic fluid	Luminex xMAP technology	first-trimester ultrasound evaluation	Adiponectin	pg/mL	94	NO			NO				NO			NO				NO			NO				NO			NO				56000	4000-357000	13	40000	12000-377000	81	0.14
YOON	2001	KOREA	mid-trimester genetic amniocentesis	amniotic fluid	ELISA	NO INFORMATION	Angiogenin	pg/mL	114																						25000	17300-30700	3	10000.0	4500-20100	16	<0.01
Kacerovsky	2013	Czech Republic	24.0-36.6 weeks	amniotic fluid	Luminex xMAP technology	first-trimester ultrasound evaluation	BDNF	pg/mL	94	NO			NO				NO			NO				NO			NO				NO			NO				269	35-930	13	118	10-481	81	0.002
LEE	2013	KOREA	20-34 weeks	amniotic fluid	Turbidimetric immunoassay	NO INFORMATION	CRP	mg/L	237								NO			NO											NO			NO
Park	2013	KOREA	<34 weeks	cord blood	ELISA	NO INFORMATION	CRP		81								NO			NO											NO			NO
Kacerovsky	2013	Czech Republic	24.0-36.6 weeks	amniotic fluid	Luminex xMAP technology	first-trimester ultrasound evaluation	CRP	pg/mL	94	NO			NO				NO			NO				NO			NO				NO			NO				3357	1278-17786	13	2037	223-24601	81	0.06
Witt	2005	AUSTRIA	23-34 weeks	maternal serum	NO INFORMATION	NO INFORMATION	CRP	mg/dL	200																						1.62	2.33*	38	0.7	0.9*	103
Kacerovsky	2014	Czech Republic	24-36.6 weeks	umbilical cord	ELISA	first trimester fetal biometry	CRP	mg/L	158																						NO			NO				5.6*	2.2–25.0	15	6.5	0.1–72.0	138	0.90
WATTS	1992	USA	24-34 weeks	materl blood	immunoturbidimetric assay	ultrasound examition	CRP	mg/mL	105																													0.7	NO	5	1.2	NO	85	NO
WOOD	2019	USA	second trimester	vagil fluid samples (self-collection)	multiplex Luminex assay	last menstrual period and ultrasound Data	Emmprin	pg/mL	119	NO			NO				NO			NO				NO			NO				NO			NO				log transformed 9.5	± 1.1	26	log transformed 9.3	± 0.9	93
COBO	2017	SPAIN	22.0-36.0 weeks	amniotic fluid	ELISA	first-trimester ultrasound scan	Glucose	mL/dL	170								NO			NO				NO			NO				NO			NO				3	0-18 *	22	37	28-54 *	148	<0.001
Rodriguez-trujillo	2016	Spain	22.0–34.0 weeks	amniotic fluid	NO INFORMATION	first-trimester ultrasound scan	Glucose	pg/mL	91	NO			NO				NO			NO				NO			NO				NO			NO				12000	3000-27000	37	31000	20000-44000	54	0.002
Yoneda	2018	JAPAN	20-29 weeks	amniotic fluid	NO INFORMATION	last menstrual period or ultrasound findings of the crown-rump length (CRL) size between 8 and 10 weeks	Glucose	mg/dL	105																													NO
Kacerovsky	2013	Czech Republic	24.0-36.6 weeks	amniotic fluid	Luminex xMAP technology	first-trimester ultrasound evaluation	GM-CSF	pg/mL	94	NO			NO				NO			NO				NO			NO				NO			NO				38	4-97	13	13	4-99	81	0.002
Allen-Daniels	2015	USA	24-34.6 weeks	vagil	REAL TIME PCR	NO INFORMATION	goiB gene		-								NO			NO
Allen-Daniels	2015	USA	24-34.6 weeks	vagil	REAL TIME PCR	NO INFORMATION	goiC gene		17								NO			NO
Kacerovsky	2013	Czech Republic	24.0-36.6 weeks	amniotic fluid	Luminex xMAP technology	first-trimester ultrasound evaluation	IGFBP-1	pg/mL	94	NO			NO				NO			NO				NO			NO				NO			NO				33000	12000-173000	13	24000	5000-185000	81	0.79
Kacerovsky	2013	Czech Republic	24.0-36.6 weeks	amniotic fluid	Luminex xMAP technology	first-trimester ultrasound evaluation	IGFBP-3	pg/mL	94	NO			NO				NO			NO				NO			NO				NO			NO				30000	22000-39000	13	31000	6000-43000	81	0.49
Kacerovsky	2013	Czech Republic	24.0-36.6 weeks	amniotic fluid	Luminex xMAP technology	first-trimester ultrasound evaluation	IL-10	pg/mL	94	NO			NO				NO			NO				NO			NO				NO			NO				183	4-2199	13	15	4-106	81	<0.0001
Jacobsson	2009	SWEDEN	22-34 weeks	amniotic fluid	ELISA	NO INFORMATION	IL-10	pg/mL	197																						284,2*	81.1_x0001_848	11	NO
Payne	2014	AUSTRALIA	15-20 weeks	amniotic fluid	multiplex - MilliPlex MAGPIX	ultrasound imaging and biometryin the first or early second trimester	IL-10	pg/mL	972															7.3	NO	2
Daskalakis	2009	GREECE	mid-trimester genetic amniocentesis	amniotic fluid	ELISA	last menstrual period or by an early ultrasound scan if there was a discrepancy of more than a week	IL-18	pg/mL	144								847.2	798.5–866.4		556.7	422.8–746.6		0.018								847.5	406.7– 632.4		482.3	406.7–632.4		0.001	NO			NO
AMABEBE	2019	UK	19-36+6 weeks	cervicovagil fluid	multiplexed bead-based immunoassay	NO INFORMATION	IL-1α	pg/mL	94	NO			NO				NO			NO				NO			NO				NO			NO				NO			NO
Figueroa	2005	USA	21-35 weeks	amniotic fluid	ELISA	last menstrual period and first or second trimester obstetrical ultrasound evaluations	IL-1α	pg/mL	43								NO			NO											NO			NO
Foulon, W	1995	Belgium	20-34 weeks	umbilical cord	ELISA	first-trimester fetal biometry	IL-1α	pg/mL	44																						NO			NO
MARCONI	2011	BRAZIL	third trimester	amniotic fluid	ELISA	ultrasound before 20 weeks	IL-1β	pg/ml	40								43	13-100.2	8	13	NO	12	0.03								NO			NO
AMABEBE	2019	UK	19-36+6 weeks	cervicovagil fluid	multiplexed bead-based immunoassay	NO INFORMATION	IL-1β	pg/mL	94	NO			NO				NO			NO				NO			NO				NO			NO				NO			NO
PERNI	2004	USA	15-19 weeks	amniotic fluid	ELISA	NO INFORMATION	IL-1β	pg/mL	179								15.9	<1-35.7	11	13.9	<1-65.3	168	NS								8.3	<1-64.7	22	14.5	<1-65.3	149	NS
Figueroa	2005	USA	21-35 weeks	amniotic fluid	ELISA	last menstrual period and first or second trimester obstetrical ultrasound evaluations	IL-1β	pg/mL	43								NO			NO											NO			NO
Yoon, B H	1998	KOREA	≤36 weeks	amniotic fluid	ELISA	NO INFORMATION	IL-1β	pg/mL	120																						274	0.3-80,000	25	3.4	0-1449	84	<0.01
Jacobsson	2009	SWEDEN	22-34 weeks	amniotic fluid	ELISA	NO INFORMATION	IL-1β	pg/mL	197																						85.5*	22.2_x0001_542	11	NO
Payne	2014	AUSTRALIA	15-20 weeks	amniotic fluid	multiplex - MilliPlex MAGPIX	ultrasound imaging and biometryin the first or early second trimester	IL-1β	pg/mL	972															0.8	NO	2
WOOD	2019	USA	second trimester	vagil fluid samples (self-collection)	multiplex Luminex assay	last menstrual period and ultrasound Data	IL-1β	pg/mL	119	NO			NO				NO			NO				NO			NO				NO			NO				log transformed 5.6	± 1.8	26	log transformed 4.5	± 1.7	93
BARTON	2003	USA	first trimester	posterior vagil walls	ELISA	NO INFORMATION	IL-1ra	pg/mL	207																						450000	10000-2000000	85	225000	0-1900000	122	<0.0001	NO			NO
PERNI	2004	USA	15-19 weeks	amniotic fluid	ELISA	NO INFORMATION	IL-1ra	pg/mL	179								3100	<4000-11400	11	3800	<4000-14900	168	NS								3800	<4000-12100	22	3700	<4000-13300	149	NS
PERNI	2004	USA	15-19 weeks	amniotic fluid	ELISA	NO INFORMATION	IL-4	pg/mL	179								4.2	<1-142.9	11	<1	<1-41.7	168	0.01								<1	<1-17.4	22	<1	<1-142.8	149	NS
MARCONI	2011	BRAZIL	third trimester	amniotic fluid	ELISA	ultrasound before 20 weeks	IL-6	pg/ml	40								166.4	34.6-182.3	8	112.6	27.6-159.7	12	0.03								NO			NO
YOON	2001	KOREA	mid-trimester genetic amniocentesis	amniotic fluid	ELISA	NO INFORMATION	IL-6	pg/mL	114																						2430	2190-2520	3	260	40-2350	16	<0.01
BASHIRI	2009	ISRAEL	17–20 weeks	amniotic fluid	ELISA	NO INFORMATION	IL-6	pg/mL	26																						2002	±759.2	3	78	±206	23	<0,001
COBO	2017	SPAIN	22.0-36.0 weeks	amniotic fluid	ELISA	first-trimester ultrasound scan	IL-6	pg/mL	170								NO			NO				NO			NO				NO			NO				55400	10900-133900 *	22	1100	500-2400 *	148	0.001
AMABEBE	2019	UK	19-36+6 weeks	cervicovagil fluid	multiplexed bead-based immunoassay	NO INFORMATION	IL-6	pg/mL	94	NO			NO				NO			NO				NO			NO				NO			NO				NO			NO
LEE	2013	KOREA	20-34 weeks	amniotic fluid	Turbidimetric immunoassay	NO INFORMATION	IL-6	pg/ml	237								NO			NO											NO			NO
PERNI	2004	USA	15-19 weeks	amniotic fluid	ELISA	NO INFORMATION	IL-6	pg/mL	179								1200	100-13200	11	700	10-13100	168	NS								600	100-12400	22	600	10-13100	149	NS
WOOD	2019	USA	second trimester	vagil fluid samples (self-collection)	multiplex Luminex assay	last menstrual period and ultrasound Data	IL-6	pg/mL	119	NO			NO				NO			NO				NO			NO				NO			NO				log transformed 1.6	± 1.3	26	log transformed 1.6	± 1.3	93
Thomakos	2009	GREECE	mid-trimester genetic amniocentesis	amniotic fluid	ELISA	last menstrual period or by an early ultrasound scan if there was a discrepancy of more than a week	IL-6	pg/mL	144								NO			NO				NO			NO				NO			NO				NO			NO
Kacerovsky	2013	Czech Republic	24.0-36.6 weeks	amniotic fluid	Luminex xMAP technology	first-trimester ultrasound evaluation	IL-6	pg/mL	94	NO			NO				NO			NO				NO			NO				NO			NO				1567	61-5090	13	337	28-4232	81	<0.0001
Kim	2003	KOREA	<37 weeks	amniotic fluid	ELISA	NO INFORMATION	IL-6	pg/ml	77																						17200*	100-115200	63	14700*	3500-87000	14	NS	NO			NO
Figueroa	2005	USA	21-35 weeks	amniotic fluid	ELISA	last menstrual period and first or second trimester obstetrical ultrasound evaluations	IL-6	pg/mL	43								NO			NO											NO			NO
Rodriguez-trujillo	2016	Spain	22.0–34.0 weeks	amniotic fluid	ELISA	first-trimester ultrasound scan	IL-6	pg/mL	91	NO			NO				NO			NO				NO			NO				NO			NO				151000	1500-121900	37	400	200-900	54	0.010
Holst	2005	SWEDEN	22-33,6 weeks	amniotic fluid	ELISA	routine ultrasound in the second trimester (16th to 19th weeks of gestation)	IL-6	pg/mL	56
Holst	2005	SWEDEN	22-33,6 weeks	cervical fluid	ELISA	routine ultrasound in the second trimester (16th to 19th weeks of gestation)	IL-6	pg/mL	89																													3050	NO	25	370	NO	25	0.0027
Musilova	2017	Czech Republic	34-36.6 weeks	umbilical cord	ELISA	first-trimester fetal biometry	IL-6	pg/mL	159																													NO			NO
Foulon, W	1995	Belgium	20-34 weeks	umbilical cord	ELISA	first-trimester fetal biometry	IL-6	pg/mL	44																						NO			NO
Jacobsson	2003	SWEDEN	<34 weeks	amniotic fluid	ELISA	routine ultrasound in the second trimester (16th to 19th weeks of gestation) and in two patients by the date of their last menstrual period.	IL-6	pg/mL	61																						274.0 [0.3->80,000] pg/mL vs 3.4 [0-1449] pg/mL
Jacobsson	2003	SWEDEN	<34 weeks	amniotic fluid	ELISA	routine ultrasound in the second trimester (16th to 20th weeks of gestation)	IL-6	pg/mL	58																						26330*	NA	9	NA	NA	NA	NA
Yoon, B H	1998	KOREA	≤36 weeks	amniotic fluid	ELISA	NO INFORMATION	IL-6	pg/mL	120																						13400	700-115200	25	900	1-137200	84	<0.01
Yoon, B H	1998	KOREA	≤36 weeks	cord blood	NO INFORMATION	NO INFORMATION	IL-6	pg/mL	120																						20.0	2.3-1199.6	25	6.7	0-5550	84	<0.01
Kacerovsky	2014	Czech Republic	24-36.6 weeks	umbilical cord	ELISA	first trimester fetal biometry	IL-6	pg/mL	158																						NO			NO				NO		>0.05	NO			>0.05
Jacobsson	2009	SWEDEN	22-34 weeks	amniotic fluid	ELISA	NO INFORMATION	IL-6	pg/mL	197																						27156.4*	0.52_x0001_53.9	11	NO
Payne	2014	AUSTRALIA	15-20 weeks	amniotic fluid	multiplex - MilliPlex MAGPIX	ultrasound imaging and biometryin the first or early second trimester	IL-6	pg/mL	972															74.4	NO	2
MARCONI	2011	BRAZIL	third trimester	amniotic fluid	ELISA	ultrasound before 20 weeks	IL-8	pg/ml	40								132.4	53.4-189	8	114.4	33.7-261	12	NS								NO			NO
AMABEBE	2019	UK	19-36+6 weeks	cervicovagil fluid	multiplexed bead-based immunoassay	NO INFORMATION	IL-8	pg/mL	94	NO			NO				NO			NO				NO			NO				NO			NO				NO			NO
KASPER	2010	AUSTRIA	amniotomy during cesarean section < 37 WEEKS'S GESTATION	amniotic fluid	chemiluminescence immunoassay	NO INFORMATION	IL-8	pg/mL	118															3520 (lower UP load)	± 714	20	1716	± 261	86	0.006								NO			NO
KASPER	2010	AUSTRIA	amniotomy during cesarean section < 37 WEEKS'S GESTATION	amniotic fluid	chemiluminescence immunoassay	NO INFORMATION	IL-8	pg/mL	118															>7500 ( higher UP load )	NO	5	1716	± 261	86	0.001								NO			NO
WOOD	2019	USA	second trimester	vagil fluid samples (self-collection)	multiplex Luminex assay	last menstrual period and ultrasound Data	IL-8	pg/mL	119	NO			NO				NO			NO				NO			NO				NO			NO				log transformed 2.6	± 2.5	26	log transformed 2.5	± 2.6	93
Kacerovsky	2013	Czech Republic	24.0-36.6 weeks	amniotic fluid	Luminex xMAP technology	first-trimester ultrasound evaluation	IL-8	pg/mL	94	NO			NO				NO			NO				NO			NO				NO			NO				456	4-4000	13	58	4-4000	81	0.002
Figueroa	2005	USA	21-35 weeks	amniotic fluid	ELISA	last menstrual period and first or second trimester obstetrical ultrasound evaluations	IL-8	pg/mL	43								NO			NO											NO			NO
Witt	2005	AUSTRIA	23-34 weeks	amniotic fluid	chemiluminescence immunoassay	NO INFORMATION	IL-8	pg/mL	107								NO			NO											3472	6365.75*	16	357	567.25*	73
Witt	2005	AUSTRIA	23-34 weeks	maternal serum	chemiluminescence immunoassay	NO INFORMATION	IL-8	pg/mL	158								NO			NO											5.1	9.2*	30	6.45	14.6*	82
Witt	2005	AUSTRIA	23-34 weeks	cord blood	chemiluminescence immunoassay	NO INFORMATION	IL-8	pg/mL	185								NO			NO											61.1	98.6*	15	31.3	72.4*	100
Holst	2005	SWEDEN	22-33,6 weeks	cervical fluid	ELISA	routine ultrasound in the second trimester (16th to 19th weeks of gestation)	IL-8	pg/mL	89																															25			25
Foulon, W	1995	Belgium	20-34 weeks	umbilical cord	ELISA	first-trimester fetal biometry	IL-8	pg/mL	44																						NO			NO
Jacobsson	2003	SWEDEN	<34 weeks	amniotic fluid	ELISA	routine ultrasound in the second trimester (16th to 20th weeks of gestation)	IL-8	pg/mL	58																						9930*	NA	9	NA	NA	NA	NA
Yoneda	2018	JAPAN	20-29 weeks	amniotic fluid	ELISA	last menstrual period or ultrasound findings of the crown-rump length (CRL) size between 8 and 10 weeks	IL-8	pg/mL	105																													NO
Kacerovsky	2009	Czech Republic	24-36 weeks	amniotic fluid	ELISA	last menstrual period and confirmed by ultrasound measurement of a crown-rump length (CRL) during the first trimester	IL-8	pg/mL	29															*1869.5							*2612.33							*5577
Pacora	2000	KOREA	mid and thrid-trimester	amniotic fluid	ELISA	NO INFORMATION	Lactoferrin	ng/mL	268																						NO			NO
Kacerovsky	2013	Czech Republic	24.0-36.6 weeks	amniotic fluid	Luminex xMAP technology	first-trimester ultrasound evaluation	Leptin	pg/mL	94	NO			NO				NO			NO				NO			NO				NO			NO				818	234-4564	13	930	42-7672	81	0.81
Kacerovsky	2013	Czech Republic	24.0-36.6 weeks	amniotic fluid	Luminex xMAP technology	first-trimester ultrasound evaluation	MCP-1	pg/mL	94	NO			NO				NO			NO				NO			NO				NO			NO				846	38-2500	13	142	37-2500	81	0.004
Payne	2014	AUSTRALIA	15-20 weeks	amniotic fluid	multiplex - MilliPlex MAGPIX	ultrasound imaging and biometryin the first or early second trimester	MCP-1	pg/mL	972															1145	NO	2
Kacerovsky	2013	Czech Republic	24.0-36.6 weeks	amniotic fluid	Luminex xMAP technology	first-trimester ultrasound evaluation	MIF	pg/mL	94	NO			NO				NO			NO				NO			NO				NO			NO				7000	2000-50000	13	5000	13000-50000	81	0.55
Kacerovsky	2013	Czech Republic	24.0-36.6 weeks	amniotic fluid	Luminex xMAP technology	first-trimester ultrasound evaluation	MIP-1α	pg/mL	94	NO			NO				NO			NO				NO			NO				NO			NO				718	96-2567	13	48	4-377	81	<0.0001
YOON	2001	KOREA	mid-trimester genetic amniocentesis	amniotic fluid	ELISA	NO INFORMATION	MMP-8	pg/mL	114																						108100	53900-1954900	3	2700	300-104700	16	<0.01
OH	2010	KOREA	16-29 weeks	amniotic fluid	ELISA; HEMOCYTOMETER	NO INFORMATION	MMP-8	pg/Ml (PCR+)	58								NO			NO				NO			NO				NO			NO				178400	45700-6142600	11	51400	500-1801400	47	<0.05
OH	2010	KOREA	16-29 weeks	amniotic fluid	ELISA; HEMOCYTOMETER	NO INFORMATION	MMP-8	pg/mL (culture+)	58								NO			NO				NO			NO				NO			NO				547300	129100-770600	3	51400	500-1801400	55	<0.05
WOOD	2019	USA	second trimester	vagil fluid samples (self-collection)	multiplex Luminex assay	last menstrual period and ultrasound Data	MMP-8	pg/mL	119	NO			NO				NO			NO				NO			NO				NO			NO				log transformed 11.0	± 2.9	26	log transformed 11.0	± 3.0	93
Park	2013	KOREA	<34 weeks	amniotic fluid	ELISA	NO INFORMATION	MMP-8	pg/mL	81								NO			NO											NO			NO
WOOD	2019	USA	second trimester	vagil fluid samples (self-collection)	multiplex Luminex assay	last menstrual period and ultrasound Data	MMP-9	pg/mL	119	NO			NO				NO			NO				NO			NO				NO			NO				log transformed 11.3	± 2.1	26	log transformed 10.5	± 3.1	93
Kacerovsky	2013	Czech Republic	24.0-36.6 weeks	amniotic fluid	Luminex xMAP technology	first-trimester ultrasound evaluation	MMP-9	pg/mL	94	NO			NO				NO			NO				NO			NO				NO			NO				4193	956-68255	13	2021	461-16325	81	0.004
WOOD	2019	USA	second trimester	vagil fluid samples (self-collection)	multiplex Luminex assay	last menstrual period and ultrasound Data	NGAL	pg/mL	119	NO			NO				NO			NO				NO			NO				NO			NO				log transformed 10.1	± 0.3	26	log transformed 10.0	± 0.1	93
Kacerovsky	2013	Czech Republic	24.0-36.6 weeks	amniotic fluid	Luminex xMAP technology	first-trimester ultrasound evaluation	NT-3	pg/mL	94	NO			NO				NO			NO				NO			NO				NO			NO				551	217-957	13	368	120-1259	81	0.04
Kacerovsky	2014	Czech Republic	24.0-36.6 weeks	amniotic fluid	ELISA	first-trimester ultrasound evaluation	Nucleosome		80								NO			NO				NO			NO				NO			NO				0.36	0.05-1.47	15	0.32	0.05-1.96	65	>0.05
Cherouny	1993	USA	≤34 weeks	amniotic fluid	ELISA	ultrasonography or neotal assessment at University Hospital in all cases	P-I/IL-8	pg/mL	58																						12000	200-58000	NO	64000	400-460000	NO	<0.01
AMABEBE	2019	UK	19-36+6 weeks	cervicovagil fluid	multiplexed bead-based immunoassay	NO INFORMATION	RANTES	pg/mL	94	NO			NO				NO			NO				NO			NO				NO			NO				NO			NO
Espinoza	2002	USA	mid and thrid-trimester	amniotic fluid	ELISA		sCD14	pg/mL	44	NO			NO				NO			NO				NO			NO				NO			NO				NO			NO
Kacerovsky	2013	Czech Republic	24.0-36.6 weeks	amniotic fluid	Luminex xMAP technology	first-trimester ultrasound evaluation	SIL-6Rα	pg/mL	94	NO			NO				NO			NO				NO			NO				NO			NO				523	65-2987	13	225	38-1843	81	0.09
WOOD	2019	USA	second trimester	vagil fluid samples (self-collection)	multiplex Luminex assay	last menstrual period and ultrasound Data	SLPI	pg/mL	119	NO			NO				NO			NO				NO			NO				NO			NO				log transformed 12.4	± 2.7	26	log transformed 13.3	± 1.5	93
Kacerovsky	2013	Czech Republic	24.0-36.6 weeks	amniotic fluid	Luminex xMAP technology	first-trimester ultrasound evaluation	STNF-R1	pg/mL	94	NO			NO				NO			NO				NO			NO				NO			NO				1090	249-4717	13	369	135-3943	81	0.05
MARCONI	2011	BRAZIL	third trimester	amniotic fluid	ELISA	ultrasound before 20 weeks	TNF-α	pg/ml	40								7.9	NO	8	13.1	NO	12	NS								NO			NO
PERNI	2004	USA	15-19 weeks	amniotic fluid	ELISA	NO INFORMATION	TNF-α	pg/mL	179								1.2	<1-7.0	11	1.0	<1-20.3	168	NS								<1	<1-20.4	22	<1	<1-8.7	149	NS
WOOD	2019	USA	second trimester	vagil fluid samples (self-collection)	multiplex Luminex assay	last menstrual period and ultrasound Data	TNF-α	pg/mL	119	NO			NO				NO			NO				NO			NO				NO			NO				log transformed 2.2	± 0.7	26	log transformed 2.0	± 0.6	93
Thomakos	2009	GREECE	mid-trimester genetic amniocentesis	amniotic fluid	ELISA	last menstrual period or by an early ultrasound scan if there was a discrepancy of more than a week	TNF-α	pg/mL	144								NO			NO				NO			NO				NO			NO				NO			NO
Figueroa	2005	USA	21-35 weeks	amniotic fluid	ELISA	last menstrual period and first or second trimester obstetrical ultrasound evaluations	TNF-α	pg/mL	43								NO			NO											NO			NO
Foulon, W	1995	Belgium	20-34 weeks	umbilical cord	ELISA	first-trimester fetal biometry	TNF-α	pg/mL	44																						NO			NO
Yoon, B H	1998	KOREA	≤36 weeks	amniotic fluid	ELISA	NO INFORMATION	TNF-α	pg/mL	120																						85.5	0.9-1600	25	2.4	0-1142	84	<0.01
Jacobsson	2009	SWEDEN	22-34 weeks	amniotic fluid	ELISA	NO INFORMATION	TNF-α	pg/mL	197																						66.2*	70.0-228.0	11	NO
Payne	2014	AUSTRALIA	15-20 weeks	amniotic fluid	multiplex - MilliPlex MAGPIX	ultrasound imaging and biometryin the first or early second trimester	TNF-α	pg/mL	972															6.5	NO	2
AMABEBE	2019	UK	19-36+6 weeks	cervicovagil fluid	multiplexed bead-based immunoassay	NO INFORMATION	TNFr1	pg/mL	94	NO			NO				NO			NO				NO			NO				NO			NO				NO			NO
Kacerovsky	2013	Czech Republic	24.0-36.6 weeks	amniotic fluid	Luminex xMAP technology	first-trimester ultrasound evaluation	TREM-1	pg/mL	94	NO			NO				NO			NO				NO			NO				NO			NO				354	114-2790	13	159	50-680	81	0.001
OH	2010	KOREA	16-29 weeks	amniotic fluid	ELISA; HEMOCYTOMETER	NO INFORMATION	WBC	cells/mm3 (PCR+)	58								NO			NO				NO			NO				NO			NO				501	2->1000	11	3	0-1000	47	<0.001
OH	2010	KOREA	16-29 weeks	amniotic fluid	ELISA; HEMOCYTOMETER	NO INFORMATION	WBC	cells/mm3 (culture+)	58								NO			NO				NO			NO				NO			NO				775	62->1000	3	3	0-1000	55	<0.05
LEE	2013	KOREA	20-34 weeks	amniotic fluid	Turbidimetric immunoassay	NO INFORMATION	WBC	cells/mm3	237								NO			NO											NO			NO
Kim	2003	KOREA	<37 weeks	amniotic fluid	hemocytometer chamber	NO INFORMATION	WBC	cells/mm3	77																						405*	0-8640	63	397*	1-<1000	14	NS	NO			NO
Witt	2005	AUSTRIA	23-34 weeks	maternal serum	NO INFORMATION	NO INFORMATION	WBC	cells/mm3	200																						14.25	4.8*	38	11.4	5.9*	103
Yoon, B H	1998	KOREA	≤36 weeks	amniotic fluid	NO INFORMATION	NO INFORMATION	WBC	cells/mm3	120																						306	0-19,764	25	3	0-7956	84	<0.01
Kacerovsky	2014	Czech Republic	24-36.6 weeks	umbilical cord	ELISA	first trimester fetal biometry	WBC	cells x 10 9 L	158																						NO			NO				11.9	7.7–20.0	15	11.4	5.9–26.8	138	0.50
Yoneda	2018	JAPAN	20-29 weeks	amniotic fluid	NO INFORMATION	last menstrual period or ultrasound findings of the crown-rump length (CRL) size between 8 and 10 weeks	WBC	cells/mm3	105																													NO
WATTS	1992	USA	24-34 weeks	amniotic fluid	cell counting	ultrasound examition	WBC	cells/mm3	105																													NO	NO	5	NO	NO	85	NO
